# Supplementary material for: Effect of pH on endogenous sunlight inactivation rates of laboratory strain and wastewater sourced E. coli and enterococci
Source: Royal Society of Chemistry journal article supplement (doi:10.1039/d2em00227b), 2022-01-01
Supplement: d2em00227b1.pdf [file d2em00227b1.pdf]

## Electronic Supplementary Information

### Effect of pH on Endogenous Sunlight Inactivation Rates of Laboratory Strain and Wastewater Sourced *E. coli* and Enterococci

Mwale Chiyenge<sup>a</sup> and Andrea I. Silverman<sup>a,b\*</sup>

<sup>a</sup> Department of Civil and Urban Engineering, Tandon School of Engineering, New York University, Brooklyn, NY 11201, USA

<sup>b</sup> School of Global Public Health, New York University, New York, NY 10003, USA

\* Corresponding Author: tel: 646-997-3018; email: [andrea.silverman@nyu.edu](mailto:andrea.silverman@nyu.edu)

Address: 6 Metrotech Center, Brooklyn, NY 11201

#### 14 Pages

#### Contents

**Methodology:** Measuring sunlight inactivation rates of overnight-mixed and re-washed bacteria  
Measuring photosensitized production of singlet oxygen in the extracellular matrix of bacterial overnight suspensions

**Fig. S1.** Comparison of log-inactivation data of bacteria derived from bacterial suspensions that were left to mix overnight and bacterial suspensions that were re-washed immediately prior to experiments

**Fig. S2.** Average irradiance spectra emitted by solar simulator, average irradiance transmitted through the water column and average bacteria solution spectral absorbance

**Fig. S3.** Log-inactivation data for laboratory-cultured *E. faecalis* under different irradiance and pH conditions

**Fig. S4.** Log-inactivation data for laboratory-cultured *E. coli* under different irradiance and pH conditions

**Fig. S5.** Log-inactivation data for wastewater-sourced enterococci under different irradiance and pH conditions

**Fig. S6.** Log-inactivation data for wastewater-sourced *E. coli* under different irradiance and pH conditions

**Fig. S7.**  $k_{obs}$  at pH levels ranging from 4 to 10 observed under full-spectrum simulated sunlight and UVB-filtered simulated sunlight

**Table S1.** Volumes of 0.1 M sodium phosphate monobasic ( $\text{NaH}_2\text{PO}_4$ ), 0.1 M sodium phosphate dibasic ( $\text{Na}_2\text{HPO}_4$ ) and DI water that were combined to produce 500 mL of 20m mM Modified PBS at pH levels ranging from 4 to 10

**Table S2.** First-order sunlight inactivation rate constants,  $k_{obs}$  ( $\text{h}^{-1}$ ), calculated for the four bacterial populations at pH levels ranging from 4 to 10 under full-spectrum and UVB-filtered simulated sunlight

**Table S3.** Sunlight inactivation rate constants,  $k_{\text{obs}}$  ( $\text{h}^{-1}$ ), calculated using the multitarget decay model for the four bacterial populations at pH levels ranging from 4 to 10 under full-spectrum and UVB-filtered simulated sunlight

**Table S4.** Results of one-way ANOVA significance tests followed by Tukey multiple comparison test comparing the first-order inactivation rate constants ( $k_{\text{obs}}$ ) observed at pH ranging from pH 4 to 10 for each bacterial population

### **Measuring sunlight inactivation rates of overnight-mixed and re-washed bacteria**

Control experiments were conducted to ensure that lysates and other potentially photoactive cellular secretions released during the overnight mixing of our bacterial suspensions did not confound our experimental results by facilitating exogenous inactivation processes. These experiments compared sunlight inactivation rates of bacteria that had been left to mix overnight before experiments, with those of bacteria that had been re-washed immediately prior to experiments. *E. coli* and *E. faecalis* cultures were grown as described in section 2.1 of the main manuscript, and indigenous wastewater bacteria were sourced and concentrated as described in section 2.2 of the main manuscript. After mixing overnight, a portion of the bacteria suspensions were re-washed by centrifuging at 9500 xg for 5 min for laboratory-cultured bacteria and 7700 xg for 5 min for wastewater-sourced bacteria, discarding the supernatant and resuspending the pellet in fresh, sterile PBS by vortexing. The washing steps were repeated twice. Bacteria from the unwashed overnight suspensions and the re-washed suspensions were then inoculated separately into sterile PBS with a pH of 7 at a volume ratio of 1:100 for laboratory-sourced bacteria and 1:10 for wastewater-sourced bacteria and allowed to mix for 20 min before the start of the experiment to ensure a completely mixed solution by stirring with magnetic stir bars at 100 rpm. Thirty milliliter aliquots of these bacterial mixtures were added to each experimental reactor; duplicate reactors were evaluated for each treatment, and dark controls were included that were covered with aluminum foil. The reactors were exposed to UVB-filtered simulated light for 8 h, and 240  $\mu\text{L}$  subsamples were withdrawn intermittently from each reactor for enumeration of viable bacteria, as described in the main manuscript. Given an interest in evaluating whether the extracellular solution was contributing to exogenous inactivation, UVB-filtered sunlight was used to minimize direct endogenous processes contributing to observed inactivation, which would obscure the contribution of indirect photo-processes.

No difference was observed between sunlight inactivation rates of the two bacterial treatments for any of the four bacterial populations evaluated (Fig. S1), signifying that any potential contribution of exogenous photo-processes driven by extracellular constituents in the overnight bacterial suspension to our observed solar inactivation rates was insignificant.

### **Measuring photosensitized production of singlet oxygen in the extracellular matrix of bacterial overnight suspensions**

Additional control experiments were conducted to measure photosensitized production of singlet oxygen in PBS solutions inoculated with the supernatant collected from overnight bacterial suspensions. *E. coli* and *E. faecalis* cultures were grown as described in section 2.1 of the main manuscript, and indigenous wastewater bacteria were sourced and concentrated as described in section 2.2 of the main manuscript. After being left to mix overnight, the bacteria suspensions were centrifuged at 9500 xg for 5 min for laboratory-cultured bacteria and 7700 xg for 5 min for wastewater-sourced bacteria, and the supernatant collected and filtered through a sterile 0.2  $\mu\text{m}$  filter in order to isolate and collect the extracellular

constituents. The filtrate was inoculated into reactors containing sterile PBS of pH 4, 7 and 10 at volume ratios of 1:100 and 1:10 for laboratory-cultured and wastewater-sourced bacteria, respectively, which were the same ratios used for sunlight inactivation experiments. The solutions were magnetically stirred at 100 rpm for 10 min before being aliquoted into 30 mL reactors; duplicate reactors and a dark control (covered with aluminum foil) were evaluated for each separate pH and bacteria-source combination. The reactors were then inoculated with furfuryl alcohol (FFA) (a molecular probe for singlet oxygen ( $^1\text{O}_2$ )) at an initial concentration of 10  $\mu\text{M}$  and allowed to equilibrate by magnetically stirring at 100 rpm for 5 min, before being exposed to UVB-filtered simulated sunlight for 8 h. Intermittent subsamples of 300  $\mu\text{L}$  were collected over the duration of the experiment and the FFA concentrations in the subsamples measured using high-performance liquid chromatography (HPLC) (InfinityLab Poroshell HPH-C18 3.0 x 150 mm 4-Micron column with a 3.0 x 5 mm guard column of the same material; FFA was analyzed at  $\lambda = 219$  nm using a 10% solution of acetonitrile in Millipore water). Negative controls consisted of reactors containing PBS only spiked with FFA. Solution pH was monitored intermittently during experiments and adjusted as needed by dropwise addition of 1M HCl or 1M NaOH

Steady-state singlet oxygen concentrations were estimated based on the pseudo first-order reaction between FFA and  $^1\text{O}_2$  (Equation S1)

$$\frac{-d[\text{FFA}]}{dt} = k_{obs}[\text{FFA}] \quad (\text{S1})$$

Where  $k_{obs}$  is the observed pseudo first-order rate constant and the slope of  $\ln([\text{FFA}]/[\text{FFA}]_0)$  plotted against time.  $k_{obs}$  is also the product of the second-order reaction rate constant of FFA and  $^1\text{O}_2$  ( $k_2$ ) and the steady state singlet oxygen concentration ( $[^1\text{O}_2]_{ss}$ ) (Equation S2).

$$k_{obs} = k_2[^1\text{O}_2]_{ss} \quad (\text{S2})$$

$[^1\text{O}_2]_{ss}$  was calculated by dividing  $k_{obs}$  by  $k_2$ , which was previously reported<sup>1</sup> to be  $1.00 \times 10^8 \text{ M}^{-1}\text{s}^{-1}$  at 22  $^\circ\text{C}$ ; adjusted to 25  $^\circ\text{C}$ , the value of  $k_2$  is  $1.06 \times 10^8 \text{ M}^{-1}\text{s}^{-1}$ .

# Figures

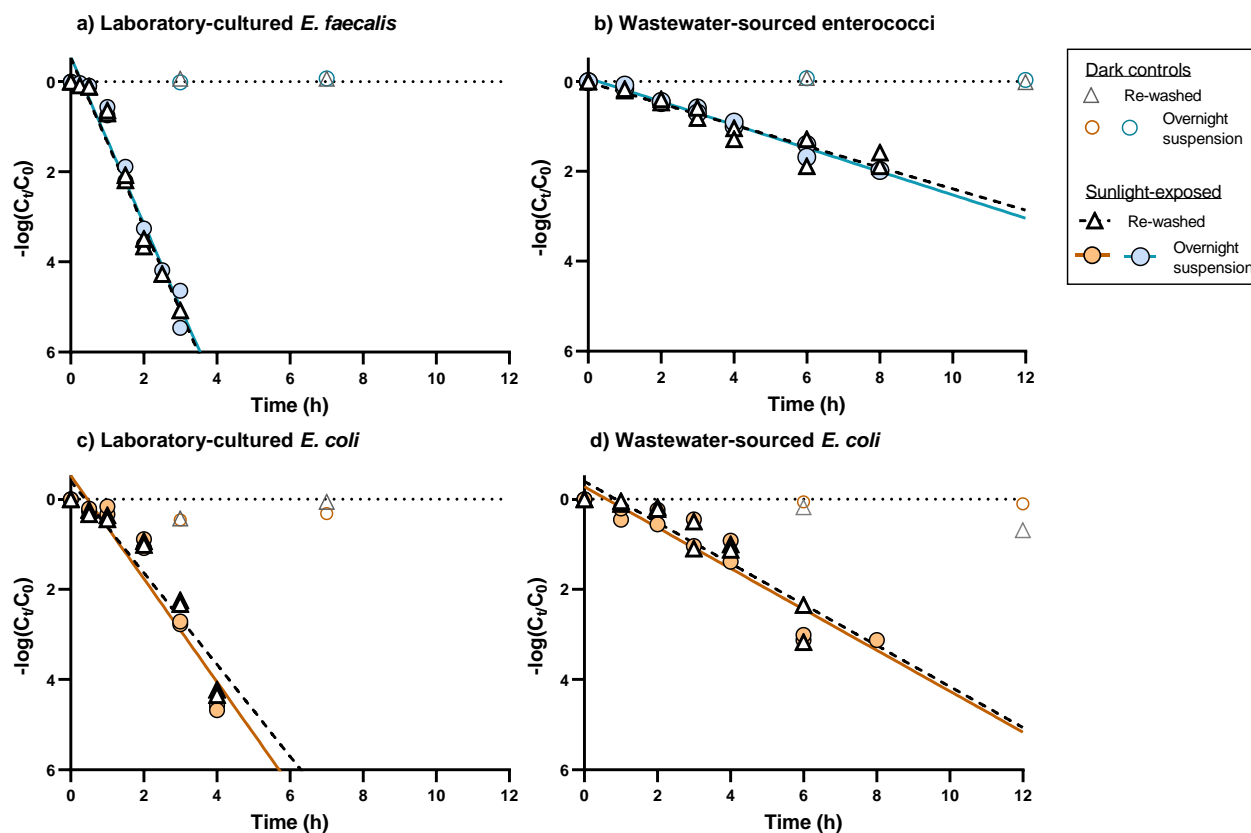

**Fig. S1.** Comparison of log-inactivation data of laboratory-cultured and wastewater-sourced *E. faecalis* (enterococci) and *E. coli* derived from bacterial suspensions that were left to mix overnight and from bacterial suspensions that were re-washed immediately prior to experiments (n=2). Inactivation was measured under UVB-filtered simulated sunlight at pH 7. Solid and dashed lines are the linear regression lines of the pooled log inactivation data of the overnight suspension and re-washed bacteria, respectively.

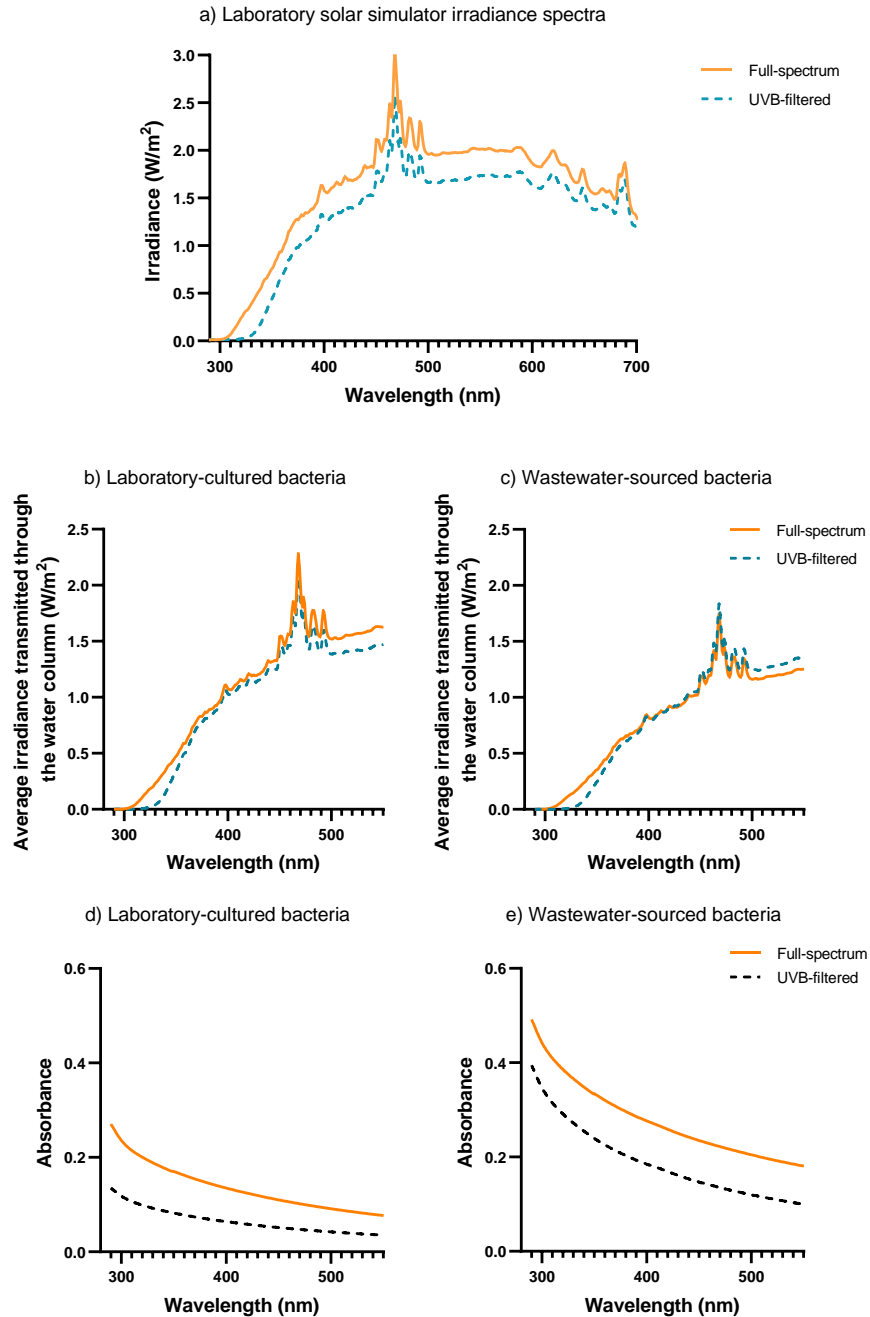

**Fig. S2. Top panel (a):** Average irradiance spectra emitted by the solar simulator with an air mass filter and atmospheric attenuation filter only (full-spectrum;  $n=6$ ) and with an air mass filter, an atmospheric attenuation filter and UVB/C-blocking filter (UVB-filtered;  $n=3$ ) **Middle panels:** Average irradiance transmitted through the water column,  $\langle E_0(z, \lambda) \rangle$  ( $\text{W m}^{-2}$ ), in experiments with (b) laboratory-cultured and (c) wastewater-sourced bacteria. **Bottom panels:** Average spectral absorbance of bacteria solutions measured during experiments with (d) laboratory-cultured and (e) wastewater-sourced bacteria during experiments performed under full-spectrum simulated sunlight and UVB-filtered simulated sunlight. The differences in the spectral absorbance measured during the two groups of experiments under different light conditions were a result of differences in the average starting bacterial concentrations during the separate experiments.

## Laboratory-cultured *E. faecalis*

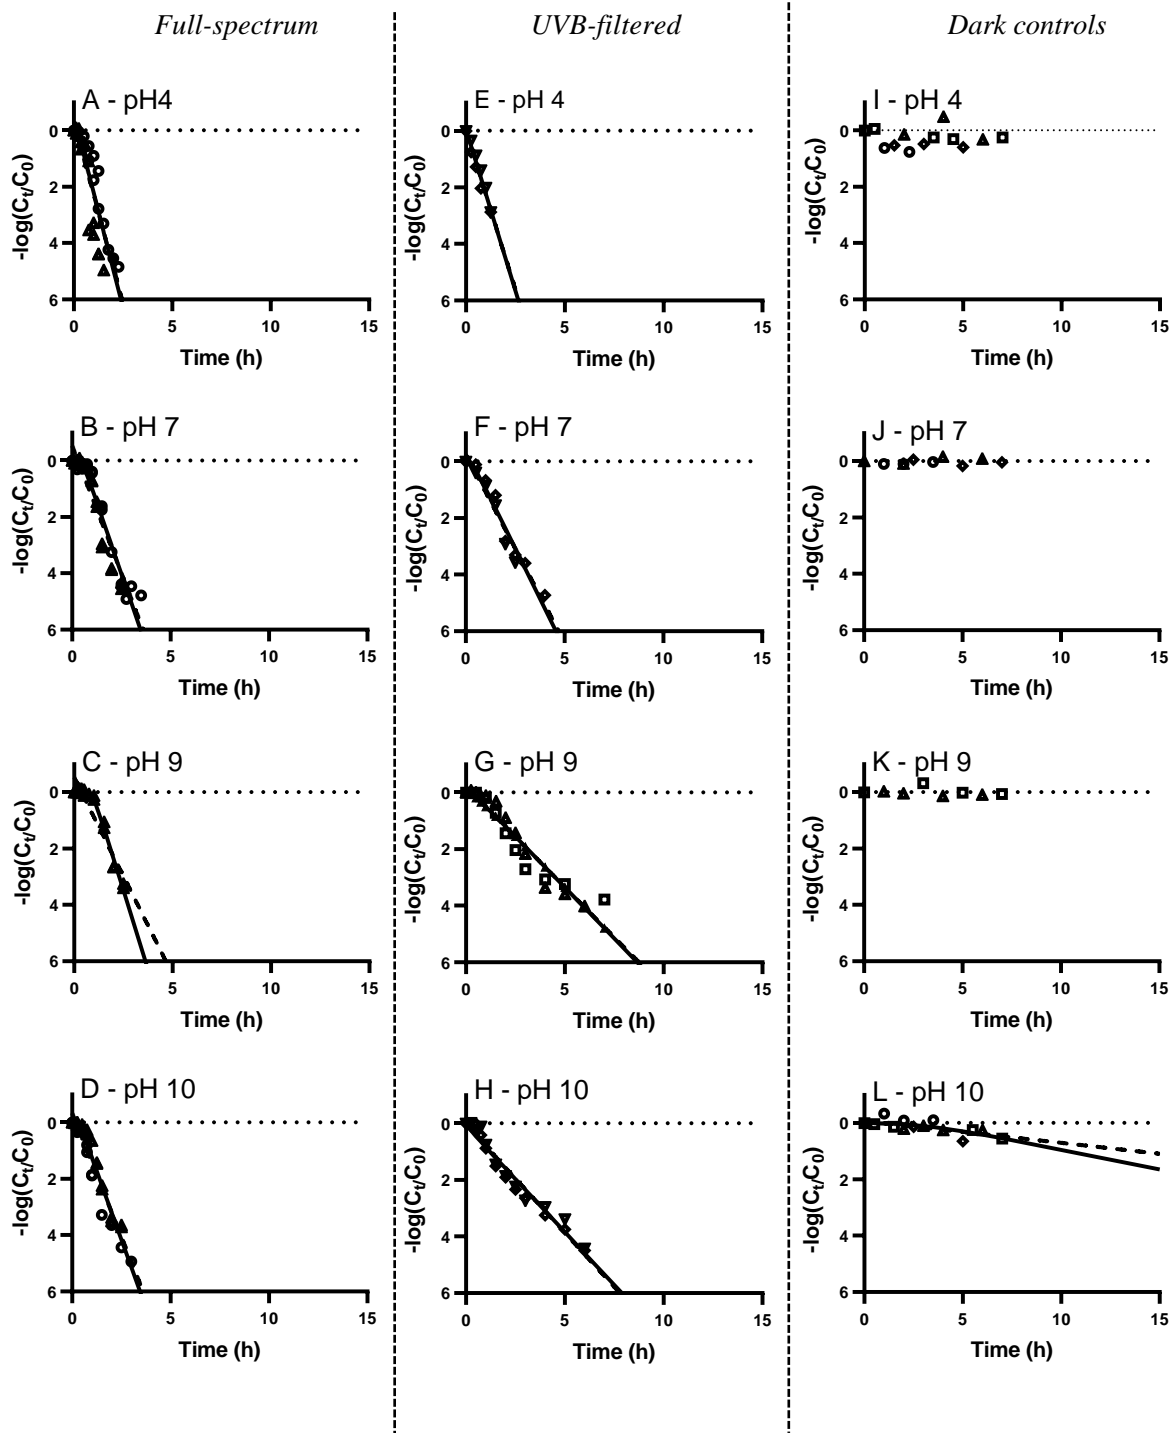

**Fig. S3.** Log-inactivation data for laboratory-cultured *E. faecalis* under different irradiance and pH conditions. A-D: under full-spectrum simulated sunlight (n=4 except pH 9 where n=2). E-H: under UVB-filtered simulated sunlight (n=2). I-L: dark controls (n=4 except pH 7 where n=3 and pH 9 where n=2). The dashed line is the linear regression line solved using the first-order decay model and the solid line is the best fit line solved using the multitarget decay model. Different symbols represent data from replicate experiments.

## Laboratory-cultured *E. coli*

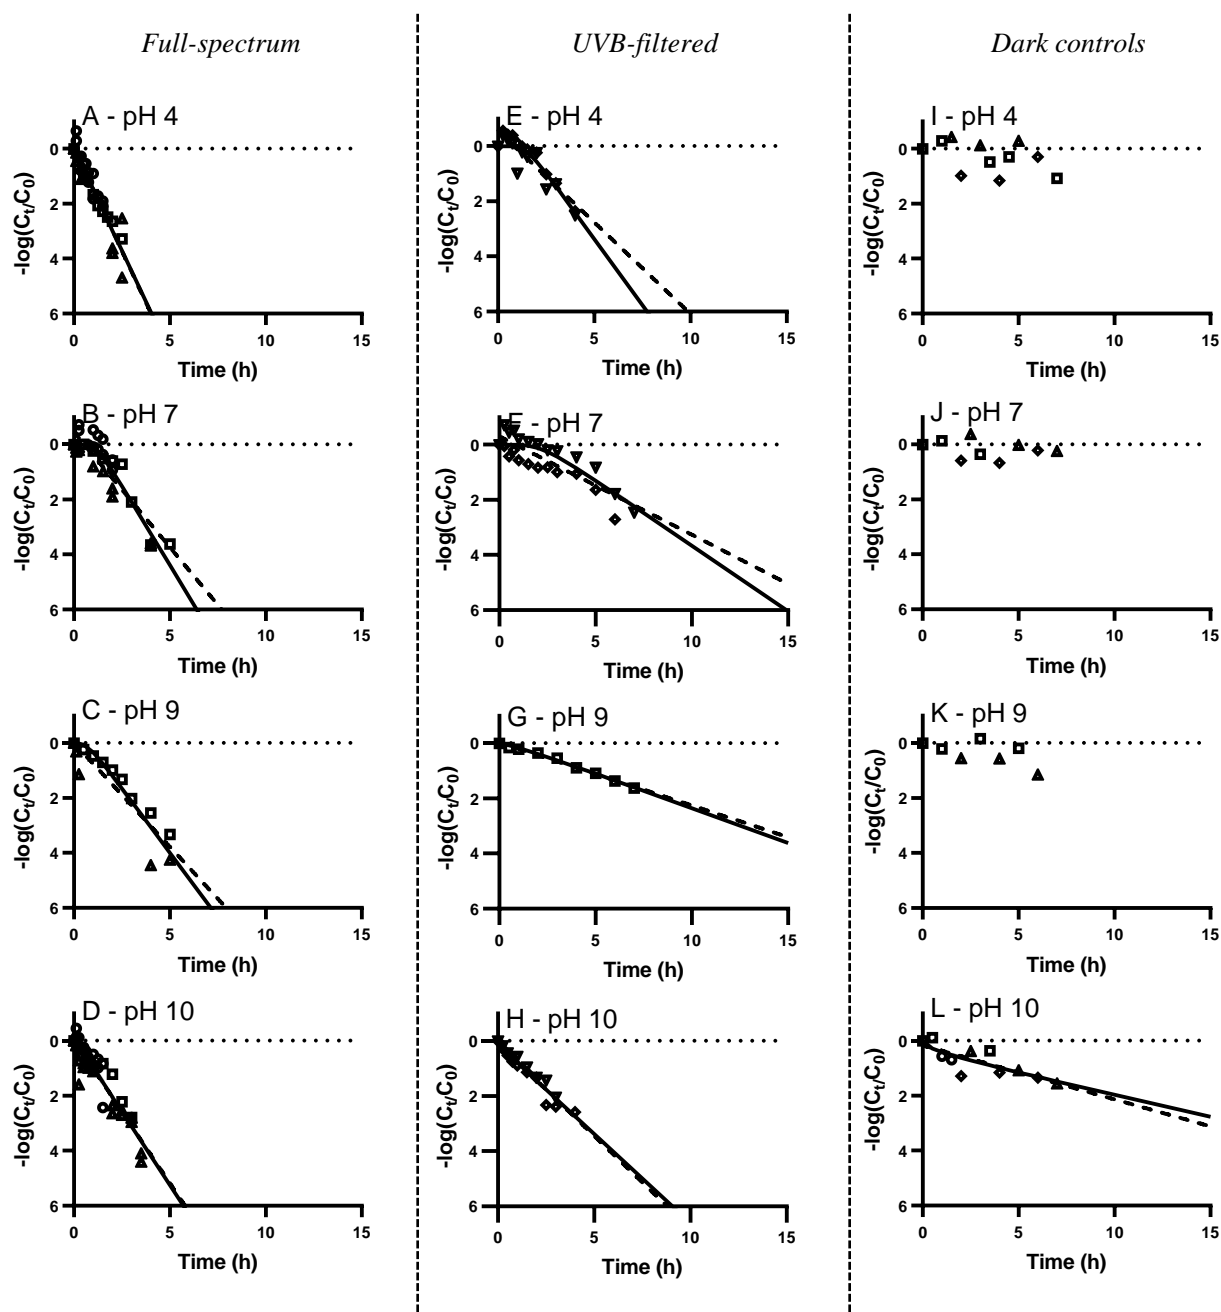

**Fig. S4.** Log-inactivation data for laboratory-cultured *E. coli* under different irradiance and pH conditions A-D: under full-spectrum simulated sunlight (n=5 except pH 9 where n=2). E-H: under UVB-filtered simulated sunlight (n=2 except pH 9 where n=1). I-L: dark controls (n=4 except pH 9 where n=2). The dashed line is the linear regression line solved using the first-order decay model and the solid line is the best fit line solved using the multitarget decay model. Different symbols represent data from replicate experiments.

## Wastewater-sourced enterococci

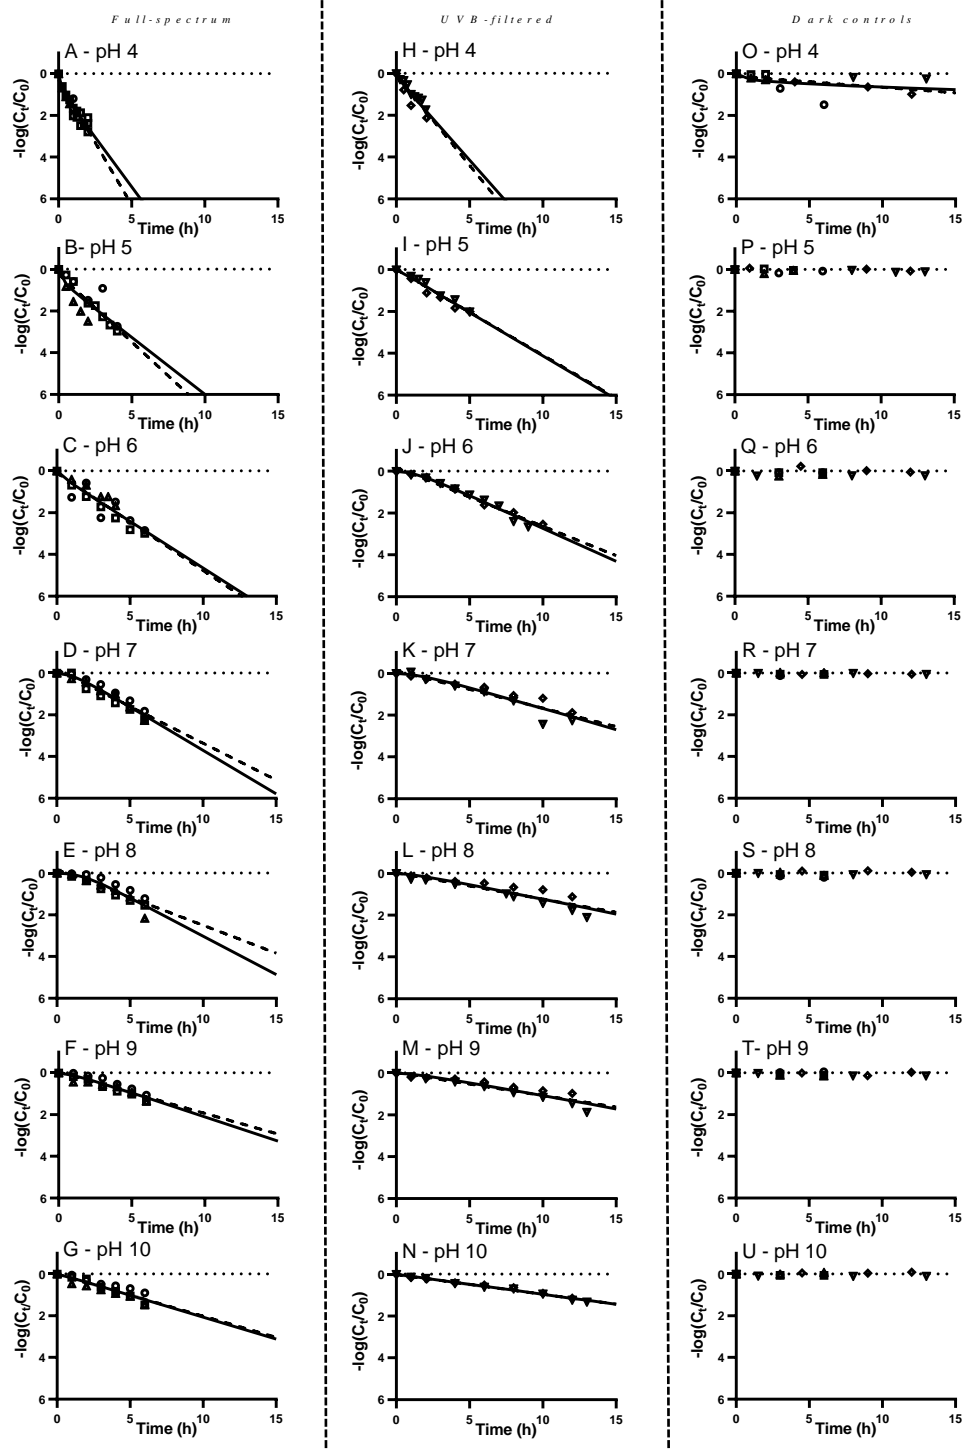

**Fig. S5.** Log-inactivation data for wastewater-sourced enterococci under different irradiance and pH conditions. A-G: under full-spectrum simulated sunlight ( $n=3$ ). H-N: under UVB-filtered simulated sunlight ( $n=2$ ). O-U: dark controls ( $n=5$ ). The dashed line is the linear regression line solved using the first-order decay model and the solid line is the best fit line solved using the multitarget decay model. Different symbols represent data from replicate experiments.



# Wastewater-sourced *E. coli*

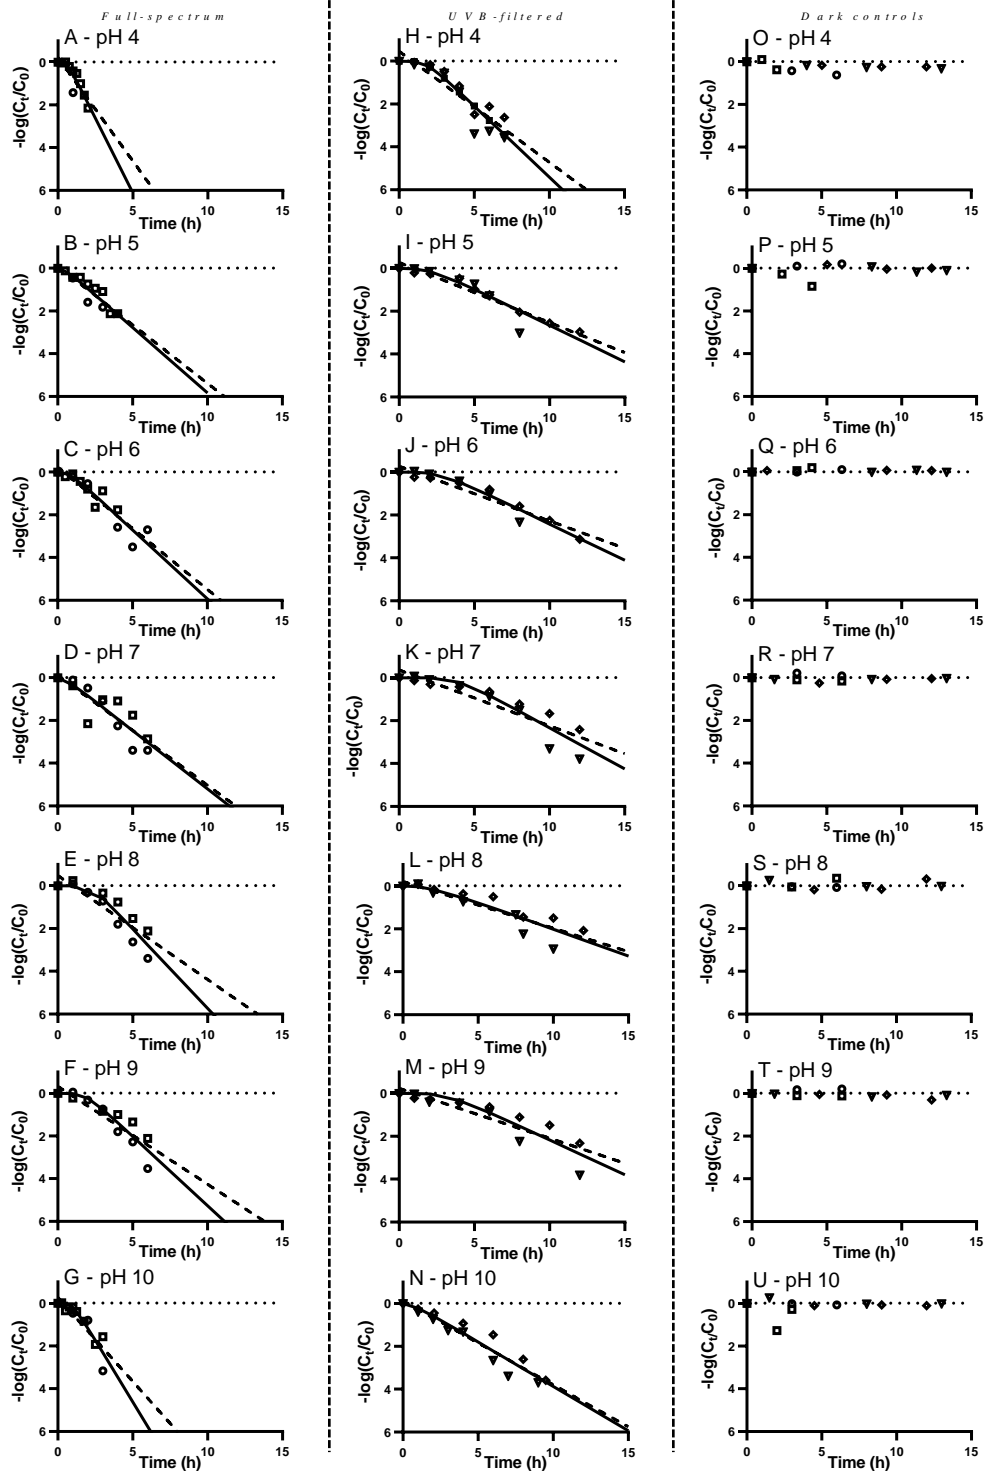

**Fig. S6.** Log-inactivation data for wastewater-sourced *E. coli* under different irradiance and pH conditions. A-G: under full-spectrum simulated sunlight (n=2). H-N: under UVB-filtered simulated sunlight (n=2). O-U: dark controls (n=4). The dashed line is the linear regression line solved using the first-order decay model and the solid line is the best fit line solved using the multitarget decay model. Different symbols represent data from replicate experiments.

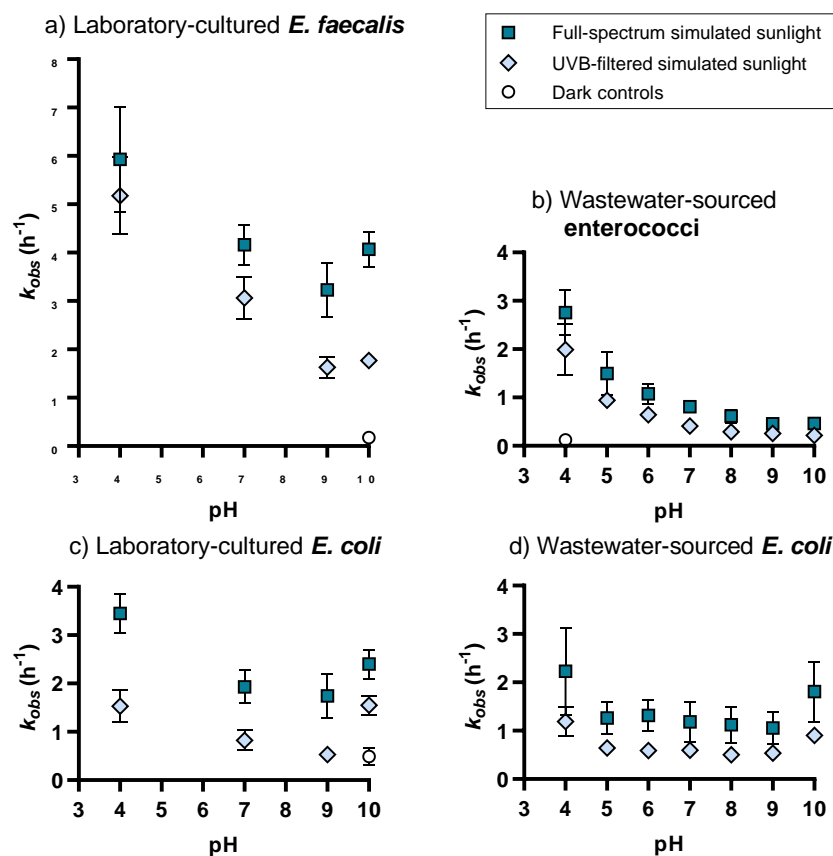

**Fig. S7.** Observed inactivation rate constants ( $k_{obs}$ ) at pH ranging from 4 to 10 for laboratory-cultured and wastewater-sourced enterococci (or *E. faecalis*) and *E. coli* under full-spectrum and UVB-filtered simulated sunlight. Inactivation rate constants were calculated based on the log-linear decay model. Dark controls were conducted at the same pHs as the sunlight-exposed treatments, however, only the dark controls with  $k_{obs}$  values significantly different from zero are presented in the figure [*i.e.*, pH 10 in panels (a) and (c), and pH 4 in panel (b)]. Error bars represent 95% CI; some error bars are smaller than the data marker.

## Tables

**Table S1.** Volumes of 0.1 M sodium phosphate monobasic ( $\text{NaH}_2\text{PO}_4$ ), 0.1 M sodium phosphate dibasic ( $\text{Na}_2\text{HPO}_4$ ) and DI water that were combined to produce 500 mL of 20 mM Modified PBS at pH ranging from 4 to 10.

| <b>Target pH</b> | <b>0.1 M <math>\text{NaH}_2\text{PO}_4</math> volume (mL)</b> | <b>0.1 M <math>\text{Na}_2\text{HPO}_4</math> volume (mL)</b> | <b>Deionized water volume (mL)</b> |
|------------------|---------------------------------------------------------------|---------------------------------------------------------------|------------------------------------|
| 4                | 99.94                                                         | 0.06                                                          | 400                                |
| 5                | 99.37                                                         | 0.63                                                          | 400                                |
| 6                | 94.06                                                         | 5.94                                                          | 400                                |
| 7                | 61.31                                                         | 38.69                                                         | 400                                |
| 8                | 13.68                                                         | 86.32                                                         | 400                                |
| 9                | 1.56                                                          | 98.44                                                         | 400                                |
| 10               | 0.16                                                          | 99.84                                                         | 400                                |

**Table S2.** First-order sunlight inactivation rate constants,  $k_{\text{obs}}$  ( $\text{h}^{-1}$ ), calculated for the four bacterial populations at pH ranging from 4 to 10 under full-spectrum and UVB-filtered simulated sunlight.  $n$  represents the total number of replicates that produced the data used to calculate  $k_{\text{obs}}$ . Slashed-out cells belong to pH conditions that were not evaluated.

|                                  | pH | Laboratory-cultured                  |           |                                      |           | Wastewater-sourced                   |            |                                      |            |
|----------------------------------|----|--------------------------------------|-----------|--------------------------------------|-----------|--------------------------------------|------------|--------------------------------------|------------|
|                                  |    | <i>E. faecalis</i>                   |           | <i>E. coli</i>                       |           | Enterococci                          |            | <i>E. coli</i>                       |            |
|                                  |    | $k_{\text{obs}} \pm 95\% \text{ CI}$ | $R^2 (n)$ | $k_{\text{obs}} \pm 95\% \text{ CI}$ | $R^2 (n)$ | $k_{\text{obs}} \pm 95\% \text{ CI}$ | $R^2 (n)$  | $k_{\text{obs}} \pm 95\% \text{ CI}$ | $R^2 (n)$  |
| Full-spectrum simulated sunlight | 4  | 5.93 ± 1.09                          | 0.80 (4)  | 3.45 ± 0.40                          | 0.89 (5)  | 2.76 ± 0.47                          | 0.89 (3)   | 2.23 ± 0.92                          | 0.77 (2)   |
|                                  | 5  | /                                    | /         | /                                    | /         | 1.50 ± 0.45                          | 0.76 (3)   | 1.26 ± 0.92                          | 0.86 (2)   |
|                                  | 6  | /                                    | /         | /                                    | /         | 1.08 ± 0.21                          | 0.87 (3)   | 1.32 ± 0.33                          | 0.86 (2)   |
|                                  | 7  | 4.17 ± 0.42                          | 0.91 (4)  | 1.93 ± 0.34                          | 0.81 (5)  | 0.81 ± 0.11                          | 0.92 (3)   | 1.18 ± 0.41                          | 0.77 (2)   |
|                                  | 8  | /                                    | /         | /                                    | /         | 0.62 ± 0.14                          | 0.82 (3)   | 1.12 ± 0.38                          | 0.80 (2)   |
|                                  | 9  | 3.23 ± 0.56                          | 0.89 (2)  | 1.74 ± 0.46                          | 0.85 (2)  | 0.46 ± 0.08                          | 0.88 (3)   | 1.06 ± 0.33                          | 0.81 (2)   |
|                                  | 10 | 4.07 ± 0.37                          | 0.94 (4)  | 2.40 ± 0.30                          | 0.86 (5)  | 0.47 ± 0.10                          | 0.84 (3)   | 1.81 ± 0.63                          | 0.79 (2)   |
| UVB-filtered simulated sunlight  | 4  | 5.18 ± 0.81                          | 0.96 (2)  | 1.53 ± 0.33                          | 0.83 (2)  | 1.99 ± 0.53                          | 0.86 (2)   | 1.19 ± 0.30                          | 0.84 (2)   |
|                                  | 5  | /                                    | /         | /                                    | /         | 0.95 ± 0.13                          | 0.96 (2)   | 0.65 ± 0.13                          | 0.89 (2)   |
|                                  | 6  | /                                    | /         | /                                    | /         | 0.64 ± 0.06                          | 0.97 (2)   | 0.59 ± 0.11                          | 0.92 (2)   |
|                                  | 7  | 3.06 ± 0.44                          | 0.95 (2)  | 0.82 ± 0.21                          | 0.75 (2)  | 0.41 ± 0.08                          | 0.89 (2)   | 0.60 ± 0.16                          | 0.82 (2)   |
|                                  | 8  | /                                    | /         | /                                    | /         | 0.29 ± 0.07                          | 0.85 (2)   | 0.50 ± 0.14                          | 0.82 (2)   |
|                                  | 9  | 1.63 ± 0.22                          | 0.92 (2)  | 0.53 ± 0.05                          | 0.99 (1)  | 0.25 ± 0.05                          | 0.88 (2)   | 0.53 ± 0.16                          | 0.80 (2)   |
|                                  | 10 | 1.77 ± 0.15                          | 0.97 (2)  | 1.55 ± 0.02                          | 0.94 (2)  | 0.22 ± 0.02                          | 0.98 (2)   | 0.90 ± 0.16                          | 0.92 (2)   |
| Dark controls                    | 4  | 0.06 ± 0.18 <sup>†</sup>             | 0.04 (4)  | 0.27 ± 0.27 <sup>†</sup>             | 0.24 (4)  | 0.12 ± 0.11                          | 0.30 (5)   | 0.05 ± 0.06 <sup>†</sup>             | 0.26 (4)   |
|                                  | 5  | /                                    | /         | /                                    | /         | 0.012 ± 0.02 <sup>†</sup>            | 0.11 (5)   | -0.003 ± 0.08 <sup>†</sup>           | 0.0005 (4) |
|                                  | 6  | /                                    | /         | /                                    | /         | 0.015 ± 0.035 <sup>†</sup>           | 0.06 (5)   | -0.007 ± 0.02 <sup>†</sup>           | 0.06 (4)   |
|                                  | 7  | -0.01 ± 0.06 <sup>†</sup>            | 0.01 (3)  | 0.11 ± 0.20 <sup>†</sup>             | 0.11 (4)  | 0.006 ± 0.01 <sup>†</sup>            | 0.11 (5)   | 0.009 ± 0.03 <sup>†</sup>            | 0.03 (4)   |
|                                  | 8  | /                                    | /         | /                                    | /         | 0.0007 ± 0.02 <sup>†</sup>           | 0.0003 (5) | -0.01 ± 0.05 <sup>†</sup>            | 0.02 (4)   |
|                                  | 9  | 0.03 ± 0.2 <sup>†</sup>              | 0.01 (2)  | 0.27 ± 0.41 <sup>†</sup>             | 0.25 (2)  | 0.016 ± 0.02 <sup>†</sup>            | 0.18 (5)   | 0.03 ± 0.04 <sup>†</sup>             | 0.23 (4)   |
|                                  | 10 | 0.18 ± 0.09                          | 0.50 (4)  | 0.49 ± 0.18                          | 0.74 (4)  | -0.0018 ± 0.02 <sup>†</sup>          | 0.003 (5)  | -0.01 ± 0.11 <sup>†</sup>            | 0.004 (4)  |

<sup>†</sup>Grayed-out values not significantly different from zero

**Table S3.** Sunlight inactivation rate constants,  $k_{\text{obs}}$  ( $\text{h}^{-1}$ ), calculated using the multitarget decay model for the four bacterial populations at pH ranging from 4 to 10 under full-spectrum and UVB-filtered simulated sunlight.  $n$  represents the total number of replicates that produced the data used to calculate  $k_{\text{obs}}$  and  $m$  represents the shoulder coefficient. Slashed-out cells belong to pH conditions that were not evaluated.

|                                  | pH | Laboratory-cultured                     |               |                                         |               | Wastewater-sourced                       |               |                                         |               |
|----------------------------------|----|-----------------------------------------|---------------|-----------------------------------------|---------------|------------------------------------------|---------------|-----------------------------------------|---------------|
|                                  |    | <i>E. faecalis</i>                      |               | <i>E. coli</i>                          |               | Enterococci                              |               | <i>E. coli</i>                          |               |
|                                  |    | $k_{\text{obs}}$ ( $m$ )                | $R^2$ ( $n$ ) | $k_{\text{obs}}$ ( $m$ )                | $R^2$ ( $n$ ) | $k_{\text{obs}}$ ( $m$ )                 | $R^2$ ( $n$ ) | $k_{\text{obs}}$ ( $m$ )                | $R^2$ ( $n$ ) |
| Full-spectrum simulated sunlight | 4  | 6.33 (3.61)                             | 0.80 (4)      | 3.43 (1.03)                             | 0.89 (5)      | 2.20 (0.22)                              | 0.93 (3)      | 3.23 (7.44)                             | 0.82 (2)      |
|                                  | 5  | /                                       | /             | /                                       | /             | 1.26 (0.30)                              | 0.75 (3)      | 1.41 (1.95)                             | 0.87 (2)      |
|                                  | 6  | /                                       | /             | /                                       | /             | 1.03 (0.68)                              | 0.87 (3)      | 1.49 (3.42)                             | 0.88 (2)      |
|                                  | 7  | 4.71 (12.4)                             | 0.94 (4)      | 2.66 (23.8)                             | 0.88 (5)      | 0.96 (2.97)                              | 0.94 (3)      | 1.26 (1.85)                             | 0.77 (2)      |
|                                  | 8  | /                                       | /             | /                                       | /             | 0.85 (4.59)                              | 0.86 (3)      | 1.71 (49.6)                             | 0.87 (2)      |
|                                  | 9  | 5.23 (156)                              | 0.99 (2)      | 2.17 (5.08)                             | 0.86 (2)      | 0.53 (1.64)                              | 0.88 (3)      | 1.50 (17.0)                             | 0.85 (2)      |
|                                  | 10 | 4.49 (5.17)                             | 0.94 (4)      | 2.48 (1.31)                             | 0.86 (5)      | 0.48 (1.12)                              | 0.85 (3)      | 2.64 (13.6)                             | 0.84 (2)      |
| UVB-filtered simulated sunlight  | 4  | 5.27 (1.15)                             | 0.96 (2)      | 2.21 (27.2)                             | 0.85 (2)      | 1.83 (0.66)                              | 0.86 (2)      | 1.53 (17.5)                             | 0.87 (2)      |
|                                  | 5  | /                                       | /             | /                                       | /             | 0.96 (1.11)                              | 0.96 (2)      | 0.78 (5.44)                             | 0.92 (2)      |
|                                  | 6  | /                                       | /             | /                                       | /             | 0.72 (2.63)                              | 0.98 (2)      | 0.78 (9.51)                             | 0.96 (2)      |
|                                  | 7  | 3.28 (3.09)                             | 0.96 (2)      | 1.1 (12.3)                              | 0.62 (2)      | 0.47 (2.24)                              | 0.89 (2)      | 0.89 (33.3)                             | 0.88 (2)      |
|                                  | 8  | /                                       | /             | /                                       | /             | 0.33 (1.63)                              | 0.85 (2)      | 0.58 (3.15)                             | 0.83 (2)      |
|                                  | 9  | 1.66 (1.83)                             | 0.92 (2)      | 0.58 (1.44)                             | 0.99 (1)      | 0.29 (1.63)                              | 0.89 (2)      | 0.75 (11.9)                             | 0.83 (2)      |
|                                  | 10 | 1.72 (0.80)                             | 0.97 (2)      | 1.49 (0.72)                             | 0.94 (2)      | 0.22 (1.02)                              | 0.98 (2)      | 0.96 (1.91)                             | 0.92 (2)      |
| Dark controls                    | 4  | $1.87 \times 10^{-6 \dagger}$<br>(0.05) | 0.18 (4)      | $4.88 \times 10^{-5 \dagger}$<br>(0.10) | 0.06 (4)      | 0.04 (0.23)                              | 0.39 (5)      | $1.69 \times 10^{-3 \dagger}$<br>(0.17) | 0.43 (4)      |
|                                  | 5  | /                                       | /             | /                                       | /             | $5.16 \times 10^{-4 \dagger}$<br>(0.37)  | 0.15 (5)      | $2.72 \times 10^{-9 \dagger}$<br>(0.11) | 0.01 (4)      |
|                                  | 6  | /                                       | /             | /                                       | /             | $6.95 \times 10^{-8 \dagger}$<br>(0.11)  | 0.11 (5)      | 0.00 (0.9)                              | -0.77 (4)     |
|                                  | 7  | 0.00 (0.05)                             | -0.04 (3)     | 0.07 <sup>†</sup> (0.73)                | 0.11 (4)      | $4.12 \times 10^{-6 \dagger}$<br>(0.26)  | 0.17 (5)      | $3.13 \times 10^{-5 \dagger}$<br>(0.27) | 0.04 (4)      |
|                                  | 8  | /                                       | /             | /                                       | /             | $2.21 \times 10^{-8 \dagger}$<br>(0.17)  | 0.02 (5)      | 0.00 (0.2)                              | -0.05 (4)     |
|                                  | 9  | 0.00 (0.12)                             | -0.02 (2)     | 0.27 <sup>†</sup> (115)                 | -0.31 (2)     | $2.04 \times 10^{-3 \dagger}$<br>(0.47)  | 0.21 (5)      | 0.12 <sup>†</sup> (4.11)                | 0.28 (4)      |
|                                  | 10 | 0.33 (3.39)                             | 0.53 (4)      | 0.37 (0.43)                             | 0.76 (4)      | $1.09 \times 10^{-11 \dagger}$<br>(0.16) | 0.0019 (5)    | $8.45 \times 10^{-11}$<br>(0.05)        | 0.04 (4)      |

<sup>†</sup>Grayed-out values not significantly different from zero

**Table S4.** Results of one-way ANOVA significance tests followed by Tukey multiple comparison test comparing first-order inactivation rate constants ( $k_{obs}$ ) observed at pH ranging from 4 to 10 for laboratory-cultured and wastewater-sourced enterococci (or *E. faecalis*) and *E. coli* under full-spectrum and UVB-filtered simulated sunlight. \* $P<0.05$ , \*\* $P<0.01$ , \*\*\* $P<0.001$ , \*\*\*\* $P<0.0001$ , ns: not significant. The slashes in the tables for the laboratory-cultured bacteria represent pH treatments that were not included in the study.

|                | Laboratory-cultured                                                                                                                                                                                                                                                                                                                                                                                                                                                                                                                                                                                                                                                                                                                                                                                                                                                          | Wastewater-sourced |      |      |      |      |      |      |    |   |  |   |   |      |   |      |      |   |  |  |   |   |   |   |   |   |  |  |  |   |   |   |   |   |  |  |  |  |   |      |      |   |  |  |  |  |  |   |   |   |  |  |  |  |  |  |      |    |  |  |  |  |  |  |  |                                                                                                                                                                                                                                                                                                                                                                                                                                                                                                                                                                                                                                                                                                                                                                                                                                                                                                     |    |   |   |   |   |   |   |    |   |  |      |      |      |      |      |      |   |  |  |    |     |      |      |      |   |  |  |  |    |    |    |    |   |  |  |  |  |    |    |    |   |  |  |  |  |  |    |    |   |  |  |  |  |  |  |    |    |  |  |  |  |  |  |  |
|----------------|------------------------------------------------------------------------------------------------------------------------------------------------------------------------------------------------------------------------------------------------------------------------------------------------------------------------------------------------------------------------------------------------------------------------------------------------------------------------------------------------------------------------------------------------------------------------------------------------------------------------------------------------------------------------------------------------------------------------------------------------------------------------------------------------------------------------------------------------------------------------------|--------------------|------|------|------|------|------|------|----|---|--|---|---|------|---|------|------|---|--|--|---|---|---|---|---|---|--|--|--|---|---|---|---|---|--|--|--|--|---|------|------|---|--|--|--|--|--|---|---|---|--|--|--|--|--|--|------|----|--|--|--|--|--|--|--|-----------------------------------------------------------------------------------------------------------------------------------------------------------------------------------------------------------------------------------------------------------------------------------------------------------------------------------------------------------------------------------------------------------------------------------------------------------------------------------------------------------------------------------------------------------------------------------------------------------------------------------------------------------------------------------------------------------------------------------------------------------------------------------------------------------------------------------------------------------------------------------------------------|----|---|---|---|---|---|---|----|---|--|------|------|------|------|------|------|---|--|--|----|-----|------|------|------|---|--|--|--|----|----|----|----|---|--|--|--|--|----|----|----|---|--|--|--|--|--|----|----|---|--|--|--|--|--|--|----|----|--|--|--|--|--|--|--|
| Enterococci    | <table border="1"> <thead> <tr> <th>pH</th> <th>4</th> <th>5</th> <th>6</th> <th>7</th> <th>8</th> <th>9</th> <th>10</th> </tr> </thead> <tbody> <tr> <th>4</th> <td></td> <td>/</td> <td>/</td> <td>***</td> <td>/</td> <td>****</td> <td>***</td> </tr> <tr> <th>5</th> <td></td> <td></td> <td>/</td> <td>/</td> <td>/</td> <td>/</td> <td>/</td> </tr> <tr> <th>6</th> <td></td> <td></td> <td></td> <td>/</td> <td>/</td> <td>/</td> <td>/</td> </tr> <tr> <th>7</th> <td></td> <td></td> <td></td> <td></td> <td>/</td> <td>ns</td> <td>ns</td> </tr> <tr> <th>8</th> <td></td> <td></td> <td></td> <td></td> <td></td> <td>/</td> <td>/</td> </tr> <tr> <th>9</th> <td></td> <td></td> <td></td> <td></td> <td></td> <td></td> <td>ns</td> </tr> <tr> <th>10</th> <td></td> <td></td> <td></td> <td></td> <td></td> <td></td> <td></td> </tr> </tbody> </table>       | pH                 | 4    | 5    | 6    | 7    | 8    | 9    | 10 | 4 |  | / | / | ***  | / | **** | ***  | 5 |  |  | / | / | / | / | / | 6 |  |  |  | / | / | / | / | 7 |  |  |  |  | / | ns   | ns   | 8 |  |  |  |  |  | / | / | 9 |  |  |  |  |  |  | ns   | 10 |  |  |  |  |  |  |  | <table border="1"> <thead> <tr> <th>pH</th> <th>4</th> <th>5</th> <th>6</th> <th>7</th> <th>8</th> <th>9</th> <th>10</th> </tr> </thead> <tbody> <tr> <th>4</th> <td></td> <td>****</td> <td>****</td> <td>****</td> <td>****</td> <td>****</td> <td>****</td> </tr> <tr> <th>5</th> <td></td> <td></td> <td>ns</td> <td>**</td> <td>****</td> <td>****</td> <td>****</td> </tr> <tr> <th>6</th> <td></td> <td></td> <td></td> <td>ns</td> <td>ns</td> <td>**</td> <td>**</td> </tr> <tr> <th>7</th> <td></td> <td></td> <td></td> <td></td> <td>ns</td> <td>ns</td> <td>ns</td> </tr> <tr> <th>8</th> <td></td> <td></td> <td></td> <td></td> <td></td> <td>ns</td> <td>ns</td> </tr> <tr> <th>9</th> <td></td> <td></td> <td></td> <td></td> <td></td> <td></td> <td>ns</td> </tr> <tr> <th>10</th> <td></td> <td></td> <td></td> <td></td> <td></td> <td></td> <td></td> </tr> </tbody> </table> | pH | 4 | 5 | 6 | 7 | 8 | 9 | 10 | 4 |  | **** | **** | **** | **** | **** | **** | 5 |  |  | ns | **  | **** | **** | **** | 6 |  |  |  | ns | ns | ** | ** | 7 |  |  |  |  | ns | ns | ns | 8 |  |  |  |  |  | ns | ns | 9 |  |  |  |  |  |  | ns | 10 |  |  |  |  |  |  |  |
|                | pH                                                                                                                                                                                                                                                                                                                                                                                                                                                                                                                                                                                                                                                                                                                                                                                                                                                                           | 4                  | 5    | 6    | 7    | 8    | 9    | 10   |    |   |  |   |   |      |   |      |      |   |  |  |   |   |   |   |   |   |  |  |  |   |   |   |   |   |  |  |  |  |   |      |      |   |  |  |  |  |  |   |   |   |  |  |  |  |  |  |      |    |  |  |  |  |  |  |  |                                                                                                                                                                                                                                                                                                                                                                                                                                                                                                                                                                                                                                                                                                                                                                                                                                                                                                     |    |   |   |   |   |   |   |    |   |  |      |      |      |      |      |      |   |  |  |    |     |      |      |      |   |  |  |  |    |    |    |    |   |  |  |  |  |    |    |    |   |  |  |  |  |  |    |    |   |  |  |  |  |  |  |    |    |  |  |  |  |  |  |  |
|                | 4                                                                                                                                                                                                                                                                                                                                                                                                                                                                                                                                                                                                                                                                                                                                                                                                                                                                            |                    | /    | /    | ***  | /    | **** | ***  |    |   |  |   |   |      |   |      |      |   |  |  |   |   |   |   |   |   |  |  |  |   |   |   |   |   |  |  |  |  |   |      |      |   |  |  |  |  |  |   |   |   |  |  |  |  |  |  |      |    |  |  |  |  |  |  |  |                                                                                                                                                                                                                                                                                                                                                                                                                                                                                                                                                                                                                                                                                                                                                                                                                                                                                                     |    |   |   |   |   |   |   |    |   |  |      |      |      |      |      |      |   |  |  |    |     |      |      |      |   |  |  |  |    |    |    |    |   |  |  |  |  |    |    |    |   |  |  |  |  |  |    |    |   |  |  |  |  |  |  |    |    |  |  |  |  |  |  |  |
|                | 5                                                                                                                                                                                                                                                                                                                                                                                                                                                                                                                                                                                                                                                                                                                                                                                                                                                                            |                    |      | /    | /    | /    | /    | /    |    |   |  |   |   |      |   |      |      |   |  |  |   |   |   |   |   |   |  |  |  |   |   |   |   |   |  |  |  |  |   |      |      |   |  |  |  |  |  |   |   |   |  |  |  |  |  |  |      |    |  |  |  |  |  |  |  |                                                                                                                                                                                                                                                                                                                                                                                                                                                                                                                                                                                                                                                                                                                                                                                                                                                                                                     |    |   |   |   |   |   |   |    |   |  |      |      |      |      |      |      |   |  |  |    |     |      |      |      |   |  |  |  |    |    |    |    |   |  |  |  |  |    |    |    |   |  |  |  |  |  |    |    |   |  |  |  |  |  |  |    |    |  |  |  |  |  |  |  |
| 6              |                                                                                                                                                                                                                                                                                                                                                                                                                                                                                                                                                                                                                                                                                                                                                                                                                                                                              |                    |      | /    | /    | /    | /    |      |    |   |  |   |   |      |   |      |      |   |  |  |   |   |   |   |   |   |  |  |  |   |   |   |   |   |  |  |  |  |   |      |      |   |  |  |  |  |  |   |   |   |  |  |  |  |  |  |      |    |  |  |  |  |  |  |  |                                                                                                                                                                                                                                                                                                                                                                                                                                                                                                                                                                                                                                                                                                                                                                                                                                                                                                     |    |   |   |   |   |   |   |    |   |  |      |      |      |      |      |      |   |  |  |    |     |      |      |      |   |  |  |  |    |    |    |    |   |  |  |  |  |    |    |    |   |  |  |  |  |  |    |    |   |  |  |  |  |  |  |    |    |  |  |  |  |  |  |  |
| 7              |                                                                                                                                                                                                                                                                                                                                                                                                                                                                                                                                                                                                                                                                                                                                                                                                                                                                              |                    |      |      | /    | ns   | ns   |      |    |   |  |   |   |      |   |      |      |   |  |  |   |   |   |   |   |   |  |  |  |   |   |   |   |   |  |  |  |  |   |      |      |   |  |  |  |  |  |   |   |   |  |  |  |  |  |  |      |    |  |  |  |  |  |  |  |                                                                                                                                                                                                                                                                                                                                                                                                                                                                                                                                                                                                                                                                                                                                                                                                                                                                                                     |    |   |   |   |   |   |   |    |   |  |      |      |      |      |      |      |   |  |  |    |     |      |      |      |   |  |  |  |    |    |    |    |   |  |  |  |  |    |    |    |   |  |  |  |  |  |    |    |   |  |  |  |  |  |  |    |    |  |  |  |  |  |  |  |
| 8              |                                                                                                                                                                                                                                                                                                                                                                                                                                                                                                                                                                                                                                                                                                                                                                                                                                                                              |                    |      |      |      | /    | /    |      |    |   |  |   |   |      |   |      |      |   |  |  |   |   |   |   |   |   |  |  |  |   |   |   |   |   |  |  |  |  |   |      |      |   |  |  |  |  |  |   |   |   |  |  |  |  |  |  |      |    |  |  |  |  |  |  |  |                                                                                                                                                                                                                                                                                                                                                                                                                                                                                                                                                                                                                                                                                                                                                                                                                                                                                                     |    |   |   |   |   |   |   |    |   |  |      |      |      |      |      |      |   |  |  |    |     |      |      |      |   |  |  |  |    |    |    |    |   |  |  |  |  |    |    |    |   |  |  |  |  |  |    |    |   |  |  |  |  |  |  |    |    |  |  |  |  |  |  |  |
| 9              |                                                                                                                                                                                                                                                                                                                                                                                                                                                                                                                                                                                                                                                                                                                                                                                                                                                                              |                    |      |      |      |      | ns   |      |    |   |  |   |   |      |   |      |      |   |  |  |   |   |   |   |   |   |  |  |  |   |   |   |   |   |  |  |  |  |   |      |      |   |  |  |  |  |  |   |   |   |  |  |  |  |  |  |      |    |  |  |  |  |  |  |  |                                                                                                                                                                                                                                                                                                                                                                                                                                                                                                                                                                                                                                                                                                                                                                                                                                                                                                     |    |   |   |   |   |   |   |    |   |  |      |      |      |      |      |      |   |  |  |    |     |      |      |      |   |  |  |  |    |    |    |    |   |  |  |  |  |    |    |    |   |  |  |  |  |  |    |    |   |  |  |  |  |  |  |    |    |  |  |  |  |  |  |  |
| 10             |                                                                                                                                                                                                                                                                                                                                                                                                                                                                                                                                                                                                                                                                                                                                                                                                                                                                              |                    |      |      |      |      |      |      |    |   |  |   |   |      |   |      |      |   |  |  |   |   |   |   |   |   |  |  |  |   |   |   |   |   |  |  |  |  |   |      |      |   |  |  |  |  |  |   |   |   |  |  |  |  |  |  |      |    |  |  |  |  |  |  |  |                                                                                                                                                                                                                                                                                                                                                                                                                                                                                                                                                                                                                                                                                                                                                                                                                                                                                                     |    |   |   |   |   |   |   |    |   |  |      |      |      |      |      |      |   |  |  |    |     |      |      |      |   |  |  |  |    |    |    |    |   |  |  |  |  |    |    |    |   |  |  |  |  |  |    |    |   |  |  |  |  |  |  |    |    |  |  |  |  |  |  |  |
| pH             | 4                                                                                                                                                                                                                                                                                                                                                                                                                                                                                                                                                                                                                                                                                                                                                                                                                                                                            | 5                  | 6    | 7    | 8    | 9    | 10   |      |    |   |  |   |   |      |   |      |      |   |  |  |   |   |   |   |   |   |  |  |  |   |   |   |   |   |  |  |  |  |   |      |      |   |  |  |  |  |  |   |   |   |  |  |  |  |  |  |      |    |  |  |  |  |  |  |  |                                                                                                                                                                                                                                                                                                                                                                                                                                                                                                                                                                                                                                                                                                                                                                                                                                                                                                     |    |   |   |   |   |   |   |    |   |  |      |      |      |      |      |      |   |  |  |    |     |      |      |      |   |  |  |  |    |    |    |    |   |  |  |  |  |    |    |    |   |  |  |  |  |  |    |    |   |  |  |  |  |  |  |    |    |  |  |  |  |  |  |  |
| 4              |                                                                                                                                                                                                                                                                                                                                                                                                                                                                                                                                                                                                                                                                                                                                                                                                                                                                              | ****               | **** | **** | **** | **** | **** |      |    |   |  |   |   |      |   |      |      |   |  |  |   |   |   |   |   |   |  |  |  |   |   |   |   |   |  |  |  |  |   |      |      |   |  |  |  |  |  |   |   |   |  |  |  |  |  |  |      |    |  |  |  |  |  |  |  |                                                                                                                                                                                                                                                                                                                                                                                                                                                                                                                                                                                                                                                                                                                                                                                                                                                                                                     |    |   |   |   |   |   |   |    |   |  |      |      |      |      |      |      |   |  |  |    |     |      |      |      |   |  |  |  |    |    |    |    |   |  |  |  |  |    |    |    |   |  |  |  |  |  |    |    |   |  |  |  |  |  |  |    |    |  |  |  |  |  |  |  |
| 5              |                                                                                                                                                                                                                                                                                                                                                                                                                                                                                                                                                                                                                                                                                                                                                                                                                                                                              |                    | ns   | **   | **** | **** | **** |      |    |   |  |   |   |      |   |      |      |   |  |  |   |   |   |   |   |   |  |  |  |   |   |   |   |   |  |  |  |  |   |      |      |   |  |  |  |  |  |   |   |   |  |  |  |  |  |  |      |    |  |  |  |  |  |  |  |                                                                                                                                                                                                                                                                                                                                                                                                                                                                                                                                                                                                                                                                                                                                                                                                                                                                                                     |    |   |   |   |   |   |   |    |   |  |      |      |      |      |      |      |   |  |  |    |     |      |      |      |   |  |  |  |    |    |    |    |   |  |  |  |  |    |    |    |   |  |  |  |  |  |    |    |   |  |  |  |  |  |  |    |    |  |  |  |  |  |  |  |
| 6              |                                                                                                                                                                                                                                                                                                                                                                                                                                                                                                                                                                                                                                                                                                                                                                                                                                                                              |                    |      | ns   | ns   | **   | **   |      |    |   |  |   |   |      |   |      |      |   |  |  |   |   |   |   |   |   |  |  |  |   |   |   |   |   |  |  |  |  |   |      |      |   |  |  |  |  |  |   |   |   |  |  |  |  |  |  |      |    |  |  |  |  |  |  |  |                                                                                                                                                                                                                                                                                                                                                                                                                                                                                                                                                                                                                                                                                                                                                                                                                                                                                                     |    |   |   |   |   |   |   |    |   |  |      |      |      |      |      |      |   |  |  |    |     |      |      |      |   |  |  |  |    |    |    |    |   |  |  |  |  |    |    |    |   |  |  |  |  |  |    |    |   |  |  |  |  |  |  |    |    |  |  |  |  |  |  |  |
| 7              |                                                                                                                                                                                                                                                                                                                                                                                                                                                                                                                                                                                                                                                                                                                                                                                                                                                                              |                    |      |      | ns   | ns   | ns   |      |    |   |  |   |   |      |   |      |      |   |  |  |   |   |   |   |   |   |  |  |  |   |   |   |   |   |  |  |  |  |   |      |      |   |  |  |  |  |  |   |   |   |  |  |  |  |  |  |      |    |  |  |  |  |  |  |  |                                                                                                                                                                                                                                                                                                                                                                                                                                                                                                                                                                                                                                                                                                                                                                                                                                                                                                     |    |   |   |   |   |   |   |    |   |  |      |      |      |      |      |      |   |  |  |    |     |      |      |      |   |  |  |  |    |    |    |    |   |  |  |  |  |    |    |    |   |  |  |  |  |  |    |    |   |  |  |  |  |  |  |    |    |  |  |  |  |  |  |  |
| 8              |                                                                                                                                                                                                                                                                                                                                                                                                                                                                                                                                                                                                                                                                                                                                                                                                                                                                              |                    |      |      |      | ns   | ns   |      |    |   |  |   |   |      |   |      |      |   |  |  |   |   |   |   |   |   |  |  |  |   |   |   |   |   |  |  |  |  |   |      |      |   |  |  |  |  |  |   |   |   |  |  |  |  |  |  |      |    |  |  |  |  |  |  |  |                                                                                                                                                                                                                                                                                                                                                                                                                                                                                                                                                                                                                                                                                                                                                                                                                                                                                                     |    |   |   |   |   |   |   |    |   |  |      |      |      |      |      |      |   |  |  |    |     |      |      |      |   |  |  |  |    |    |    |    |   |  |  |  |  |    |    |    |   |  |  |  |  |  |    |    |   |  |  |  |  |  |  |    |    |  |  |  |  |  |  |  |
| 9              |                                                                                                                                                                                                                                                                                                                                                                                                                                                                                                                                                                                                                                                                                                                                                                                                                                                                              |                    |      |      |      |      | ns   |      |    |   |  |   |   |      |   |      |      |   |  |  |   |   |   |   |   |   |  |  |  |   |   |   |   |   |  |  |  |  |   |      |      |   |  |  |  |  |  |   |   |   |  |  |  |  |  |  |      |    |  |  |  |  |  |  |  |                                                                                                                                                                                                                                                                                                                                                                                                                                                                                                                                                                                                                                                                                                                                                                                                                                                                                                     |    |   |   |   |   |   |   |    |   |  |      |      |      |      |      |      |   |  |  |    |     |      |      |      |   |  |  |  |    |    |    |    |   |  |  |  |  |    |    |    |   |  |  |  |  |  |    |    |   |  |  |  |  |  |  |    |    |  |  |  |  |  |  |  |
| 10             |                                                                                                                                                                                                                                                                                                                                                                                                                                                                                                                                                                                                                                                                                                                                                                                                                                                                              |                    |      |      |      |      |      |      |    |   |  |   |   |      |   |      |      |   |  |  |   |   |   |   |   |   |  |  |  |   |   |   |   |   |  |  |  |  |   |      |      |   |  |  |  |  |  |   |   |   |  |  |  |  |  |  |      |    |  |  |  |  |  |  |  |                                                                                                                                                                                                                                                                                                                                                                                                                                                                                                                                                                                                                                                                                                                                                                                                                                                                                                     |    |   |   |   |   |   |   |    |   |  |      |      |      |      |      |      |   |  |  |    |     |      |      |      |   |  |  |  |    |    |    |    |   |  |  |  |  |    |    |    |   |  |  |  |  |  |    |    |   |  |  |  |  |  |  |    |    |  |  |  |  |  |  |  |
| Enterococci    | <table border="1"> <thead> <tr> <th>pH</th> <th>4</th> <th>5</th> <th>6</th> <th>7</th> <th>8</th> <th>9</th> <th>10</th> </tr> </thead> <tbody> <tr> <th>4</th> <td></td> <td>/</td> <td>/</td> <td>****</td> <td>/</td> <td>****</td> <td>****</td> </tr> <tr> <th>5</th> <td></td> <td></td> <td>/</td> <td>/</td> <td>/</td> <td>/</td> <td>/</td> </tr> <tr> <th>6</th> <td></td> <td></td> <td></td> <td>/</td> <td>/</td> <td>/</td> <td>/</td> </tr> <tr> <th>7</th> <td></td> <td></td> <td></td> <td></td> <td>/</td> <td>****</td> <td>****</td> </tr> <tr> <th>8</th> <td></td> <td></td> <td></td> <td></td> <td></td> <td>/</td> <td>/</td> </tr> <tr> <th>9</th> <td></td> <td></td> <td></td> <td></td> <td></td> <td></td> <td>ns</td> </tr> <tr> <th>10</th> <td></td> <td></td> <td></td> <td></td> <td></td> <td></td> <td></td> </tr> </tbody> </table> | pH                 | 4    | 5    | 6    | 7    | 8    | 9    | 10 | 4 |  | / | / | **** | / | **** | **** | 5 |  |  | / | / | / | / | / | 6 |  |  |  | / | / | / | / | 7 |  |  |  |  | / | **** | **** | 8 |  |  |  |  |  | / | / | 9 |  |  |  |  |  |  | ns   | 10 |  |  |  |  |  |  |  | <table border="1"> <thead> <tr> <th>pH</th> <th>4</th> <th>5</th> <th>6</th> <th>7</th> <th>8</th> <th>9</th> <th>10</th> </tr> </thead> <tbody> <tr> <th>4</th> <td></td> <td>****</td> <td>****</td> <td>****</td> <td>****</td> <td>****</td> <td>****</td> </tr> <tr> <th>5</th> <td></td> <td></td> <td>ns</td> <td>***</td> <td>****</td> <td>****</td> <td>****</td> </tr> <tr> <th>6</th> <td></td> <td></td> <td></td> <td>ns</td> <td>*</td> <td>*</td> <td>**</td> </tr> <tr> <th>7</th> <td></td> <td></td> <td></td> <td></td> <td>ns</td> <td>ns</td> <td>ns</td> </tr> <tr> <th>8</th> <td></td> <td></td> <td></td> <td></td> <td></td> <td>ns</td> <td>ns</td> </tr> <tr> <th>9</th> <td></td> <td></td> <td></td> <td></td> <td></td> <td></td> <td>ns</td> </tr> <tr> <th>10</th> <td></td> <td></td> <td></td> <td></td> <td></td> <td></td> <td></td> </tr> </tbody> </table>  | pH | 4 | 5 | 6 | 7 | 8 | 9 | 10 | 4 |  | **** | **** | **** | **** | **** | **** | 5 |  |  | ns | *** | **** | **** | **** | 6 |  |  |  | ns | *  | *  | ** | 7 |  |  |  |  | ns | ns | ns | 8 |  |  |  |  |  | ns | ns | 9 |  |  |  |  |  |  | ns | 10 |  |  |  |  |  |  |  |
|                | pH                                                                                                                                                                                                                                                                                                                                                                                                                                                                                                                                                                                                                                                                                                                                                                                                                                                                           | 4                  | 5    | 6    | 7    | 8    | 9    | 10   |    |   |  |   |   |      |   |      |      |   |  |  |   |   |   |   |   |   |  |  |  |   |   |   |   |   |  |  |  |  |   |      |      |   |  |  |  |  |  |   |   |   |  |  |  |  |  |  |      |    |  |  |  |  |  |  |  |                                                                                                                                                                                                                                                                                                                                                                                                                                                                                                                                                                                                                                                                                                                                                                                                                                                                                                     |    |   |   |   |   |   |   |    |   |  |      |      |      |      |      |      |   |  |  |    |     |      |      |      |   |  |  |  |    |    |    |    |   |  |  |  |  |    |    |    |   |  |  |  |  |  |    |    |   |  |  |  |  |  |  |    |    |  |  |  |  |  |  |  |
|                | 4                                                                                                                                                                                                                                                                                                                                                                                                                                                                                                                                                                                                                                                                                                                                                                                                                                                                            |                    | /    | /    | **** | /    | **** | **** |    |   |  |   |   |      |   |      |      |   |  |  |   |   |   |   |   |   |  |  |  |   |   |   |   |   |  |  |  |  |   |      |      |   |  |  |  |  |  |   |   |   |  |  |  |  |  |  |      |    |  |  |  |  |  |  |  |                                                                                                                                                                                                                                                                                                                                                                                                                                                                                                                                                                                                                                                                                                                                                                                                                                                                                                     |    |   |   |   |   |   |   |    |   |  |      |      |      |      |      |      |   |  |  |    |     |      |      |      |   |  |  |  |    |    |    |    |   |  |  |  |  |    |    |    |   |  |  |  |  |  |    |    |   |  |  |  |  |  |  |    |    |  |  |  |  |  |  |  |
|                | 5                                                                                                                                                                                                                                                                                                                                                                                                                                                                                                                                                                                                                                                                                                                                                                                                                                                                            |                    |      | /    | /    | /    | /    | /    |    |   |  |   |   |      |   |      |      |   |  |  |   |   |   |   |   |   |  |  |  |   |   |   |   |   |  |  |  |  |   |      |      |   |  |  |  |  |  |   |   |   |  |  |  |  |  |  |      |    |  |  |  |  |  |  |  |                                                                                                                                                                                                                                                                                                                                                                                                                                                                                                                                                                                                                                                                                                                                                                                                                                                                                                     |    |   |   |   |   |   |   |    |   |  |      |      |      |      |      |      |   |  |  |    |     |      |      |      |   |  |  |  |    |    |    |    |   |  |  |  |  |    |    |    |   |  |  |  |  |  |    |    |   |  |  |  |  |  |  |    |    |  |  |  |  |  |  |  |
| 6              |                                                                                                                                                                                                                                                                                                                                                                                                                                                                                                                                                                                                                                                                                                                                                                                                                                                                              |                    |      | /    | /    | /    | /    |      |    |   |  |   |   |      |   |      |      |   |  |  |   |   |   |   |   |   |  |  |  |   |   |   |   |   |  |  |  |  |   |      |      |   |  |  |  |  |  |   |   |   |  |  |  |  |  |  |      |    |  |  |  |  |  |  |  |                                                                                                                                                                                                                                                                                                                                                                                                                                                                                                                                                                                                                                                                                                                                                                                                                                                                                                     |    |   |   |   |   |   |   |    |   |  |      |      |      |      |      |      |   |  |  |    |     |      |      |      |   |  |  |  |    |    |    |    |   |  |  |  |  |    |    |    |   |  |  |  |  |  |    |    |   |  |  |  |  |  |  |    |    |  |  |  |  |  |  |  |
| 7              |                                                                                                                                                                                                                                                                                                                                                                                                                                                                                                                                                                                                                                                                                                                                                                                                                                                                              |                    |      |      | /    | **** | **** |      |    |   |  |   |   |      |   |      |      |   |  |  |   |   |   |   |   |   |  |  |  |   |   |   |   |   |  |  |  |  |   |      |      |   |  |  |  |  |  |   |   |   |  |  |  |  |  |  |      |    |  |  |  |  |  |  |  |                                                                                                                                                                                                                                                                                                                                                                                                                                                                                                                                                                                                                                                                                                                                                                                                                                                                                                     |    |   |   |   |   |   |   |    |   |  |      |      |      |      |      |      |   |  |  |    |     |      |      |      |   |  |  |  |    |    |    |    |   |  |  |  |  |    |    |    |   |  |  |  |  |  |    |    |   |  |  |  |  |  |  |    |    |  |  |  |  |  |  |  |
| 8              |                                                                                                                                                                                                                                                                                                                                                                                                                                                                                                                                                                                                                                                                                                                                                                                                                                                                              |                    |      |      |      | /    | /    |      |    |   |  |   |   |      |   |      |      |   |  |  |   |   |   |   |   |   |  |  |  |   |   |   |   |   |  |  |  |  |   |      |      |   |  |  |  |  |  |   |   |   |  |  |  |  |  |  |      |    |  |  |  |  |  |  |  |                                                                                                                                                                                                                                                                                                                                                                                                                                                                                                                                                                                                                                                                                                                                                                                                                                                                                                     |    |   |   |   |   |   |   |    |   |  |      |      |      |      |      |      |   |  |  |    |     |      |      |      |   |  |  |  |    |    |    |    |   |  |  |  |  |    |    |    |   |  |  |  |  |  |    |    |   |  |  |  |  |  |  |    |    |  |  |  |  |  |  |  |
| 9              |                                                                                                                                                                                                                                                                                                                                                                                                                                                                                                                                                                                                                                                                                                                                                                                                                                                                              |                    |      |      |      |      | ns   |      |    |   |  |   |   |      |   |      |      |   |  |  |   |   |   |   |   |   |  |  |  |   |   |   |   |   |  |  |  |  |   |      |      |   |  |  |  |  |  |   |   |   |  |  |  |  |  |  |      |    |  |  |  |  |  |  |  |                                                                                                                                                                                                                                                                                                                                                                                                                                                                                                                                                                                                                                                                                                                                                                                                                                                                                                     |    |   |   |   |   |   |   |    |   |  |      |      |      |      |      |      |   |  |  |    |     |      |      |      |   |  |  |  |    |    |    |    |   |  |  |  |  |    |    |    |   |  |  |  |  |  |    |    |   |  |  |  |  |  |  |    |    |  |  |  |  |  |  |  |
| 10             |                                                                                                                                                                                                                                                                                                                                                                                                                                                                                                                                                                                                                                                                                                                                                                                                                                                                              |                    |      |      |      |      |      |      |    |   |  |   |   |      |   |      |      |   |  |  |   |   |   |   |   |   |  |  |  |   |   |   |   |   |  |  |  |  |   |      |      |   |  |  |  |  |  |   |   |   |  |  |  |  |  |  |      |    |  |  |  |  |  |  |  |                                                                                                                                                                                                                                                                                                                                                                                                                                                                                                                                                                                                                                                                                                                                                                                                                                                                                                     |    |   |   |   |   |   |   |    |   |  |      |      |      |      |      |      |   |  |  |    |     |      |      |      |   |  |  |  |    |    |    |    |   |  |  |  |  |    |    |    |   |  |  |  |  |  |    |    |   |  |  |  |  |  |  |    |    |  |  |  |  |  |  |  |
| pH             | 4                                                                                                                                                                                                                                                                                                                                                                                                                                                                                                                                                                                                                                                                                                                                                                                                                                                                            | 5                  | 6    | 7    | 8    | 9    | 10   |      |    |   |  |   |   |      |   |      |      |   |  |  |   |   |   |   |   |   |  |  |  |   |   |   |   |   |  |  |  |  |   |      |      |   |  |  |  |  |  |   |   |   |  |  |  |  |  |  |      |    |  |  |  |  |  |  |  |                                                                                                                                                                                                                                                                                                                                                                                                                                                                                                                                                                                                                                                                                                                                                                                                                                                                                                     |    |   |   |   |   |   |   |    |   |  |      |      |      |      |      |      |   |  |  |    |     |      |      |      |   |  |  |  |    |    |    |    |   |  |  |  |  |    |    |    |   |  |  |  |  |  |    |    |   |  |  |  |  |  |  |    |    |  |  |  |  |  |  |  |
| 4              |                                                                                                                                                                                                                                                                                                                                                                                                                                                                                                                                                                                                                                                                                                                                                                                                                                                                              | ****               | **** | **** | **** | **** | **** |      |    |   |  |   |   |      |   |      |      |   |  |  |   |   |   |   |   |   |  |  |  |   |   |   |   |   |  |  |  |  |   |      |      |   |  |  |  |  |  |   |   |   |  |  |  |  |  |  |      |    |  |  |  |  |  |  |  |                                                                                                                                                                                                                                                                                                                                                                                                                                                                                                                                                                                                                                                                                                                                                                                                                                                                                                     |    |   |   |   |   |   |   |    |   |  |      |      |      |      |      |      |   |  |  |    |     |      |      |      |   |  |  |  |    |    |    |    |   |  |  |  |  |    |    |    |   |  |  |  |  |  |    |    |   |  |  |  |  |  |  |    |    |  |  |  |  |  |  |  |
| 5              |                                                                                                                                                                                                                                                                                                                                                                                                                                                                                                                                                                                                                                                                                                                                                                                                                                                                              |                    | ns   | ***  | **** | **** | **** |      |    |   |  |   |   |      |   |      |      |   |  |  |   |   |   |   |   |   |  |  |  |   |   |   |   |   |  |  |  |  |   |      |      |   |  |  |  |  |  |   |   |   |  |  |  |  |  |  |      |    |  |  |  |  |  |  |  |                                                                                                                                                                                                                                                                                                                                                                                                                                                                                                                                                                                                                                                                                                                                                                                                                                                                                                     |    |   |   |   |   |   |   |    |   |  |      |      |      |      |      |      |   |  |  |    |     |      |      |      |   |  |  |  |    |    |    |    |   |  |  |  |  |    |    |    |   |  |  |  |  |  |    |    |   |  |  |  |  |  |  |    |    |  |  |  |  |  |  |  |
| 6              |                                                                                                                                                                                                                                                                                                                                                                                                                                                                                                                                                                                                                                                                                                                                                                                                                                                                              |                    |      | ns   | *    | *    | **   |      |    |   |  |   |   |      |   |      |      |   |  |  |   |   |   |   |   |   |  |  |  |   |   |   |   |   |  |  |  |  |   |      |      |   |  |  |  |  |  |   |   |   |  |  |  |  |  |  |      |    |  |  |  |  |  |  |  |                                                                                                                                                                                                                                                                                                                                                                                                                                                                                                                                                                                                                                                                                                                                                                                                                                                                                                     |    |   |   |   |   |   |   |    |   |  |      |      |      |      |      |      |   |  |  |    |     |      |      |      |   |  |  |  |    |    |    |    |   |  |  |  |  |    |    |    |   |  |  |  |  |  |    |    |   |  |  |  |  |  |  |    |    |  |  |  |  |  |  |  |
| 7              |                                                                                                                                                                                                                                                                                                                                                                                                                                                                                                                                                                                                                                                                                                                                                                                                                                                                              |                    |      |      | ns   | ns   | ns   |      |    |   |  |   |   |      |   |      |      |   |  |  |   |   |   |   |   |   |  |  |  |   |   |   |   |   |  |  |  |  |   |      |      |   |  |  |  |  |  |   |   |   |  |  |  |  |  |  |      |    |  |  |  |  |  |  |  |                                                                                                                                                                                                                                                                                                                                                                                                                                                                                                                                                                                                                                                                                                                                                                                                                                                                                                     |    |   |   |   |   |   |   |    |   |  |      |      |      |      |      |      |   |  |  |    |     |      |      |      |   |  |  |  |    |    |    |    |   |  |  |  |  |    |    |    |   |  |  |  |  |  |    |    |   |  |  |  |  |  |  |    |    |  |  |  |  |  |  |  |
| 8              |                                                                                                                                                                                                                                                                                                                                                                                                                                                                                                                                                                                                                                                                                                                                                                                                                                                                              |                    |      |      |      | ns   | ns   |      |    |   |  |   |   |      |   |      |      |   |  |  |   |   |   |   |   |   |  |  |  |   |   |   |   |   |  |  |  |  |   |      |      |   |  |  |  |  |  |   |   |   |  |  |  |  |  |  |      |    |  |  |  |  |  |  |  |                                                                                                                                                                                                                                                                                                                                                                                                                                                                                                                                                                                                                                                                                                                                                                                                                                                                                                     |    |   |   |   |   |   |   |    |   |  |      |      |      |      |      |      |   |  |  |    |     |      |      |      |   |  |  |  |    |    |    |    |   |  |  |  |  |    |    |    |   |  |  |  |  |  |    |    |   |  |  |  |  |  |  |    |    |  |  |  |  |  |  |  |
| 9              |                                                                                                                                                                                                                                                                                                                                                                                                                                                                                                                                                                                                                                                                                                                                                                                                                                                                              |                    |      |      |      |      | ns   |      |    |   |  |   |   |      |   |      |      |   |  |  |   |   |   |   |   |   |  |  |  |   |   |   |   |   |  |  |  |  |   |      |      |   |  |  |  |  |  |   |   |   |  |  |  |  |  |  |      |    |  |  |  |  |  |  |  |                                                                                                                                                                                                                                                                                                                                                                                                                                                                                                                                                                                                                                                                                                                                                                                                                                                                                                     |    |   |   |   |   |   |   |    |   |  |      |      |      |      |      |      |   |  |  |    |     |      |      |      |   |  |  |  |    |    |    |    |   |  |  |  |  |    |    |    |   |  |  |  |  |  |    |    |   |  |  |  |  |  |  |    |    |  |  |  |  |  |  |  |
| 10             |                                                                                                                                                                                                                                                                                                                                                                                                                                                                                                                                                                                                                                                                                                                                                                                                                                                                              |                    |      |      |      |      |      |      |    |   |  |   |   |      |   |      |      |   |  |  |   |   |   |   |   |   |  |  |  |   |   |   |   |   |  |  |  |  |   |      |      |   |  |  |  |  |  |   |   |   |  |  |  |  |  |  |      |    |  |  |  |  |  |  |  |                                                                                                                                                                                                                                                                                                                                                                                                                                                                                                                                                                                                                                                                                                                                                                                                                                                                                                     |    |   |   |   |   |   |   |    |   |  |      |      |      |      |      |      |   |  |  |    |     |      |      |      |   |  |  |  |    |    |    |    |   |  |  |  |  |    |    |    |   |  |  |  |  |  |    |    |   |  |  |  |  |  |  |    |    |  |  |  |  |  |  |  |
| <i>E. coli</i> | <table border="1"> <thead> <tr> <th>pH</th> <th>4</th> <th>5</th> <th>6</th> <th>7</th> <th>8</th> <th>9</th> <th>10</th> </tr> </thead> <tbody> <tr> <th>4</th> <td></td> <td>/</td> <td>/</td> <td>****</td> <td>/</td> <td>****</td> <td>****</td> </tr> <tr> <th>5</th> <td></td> <td></td> <td>/</td> <td>/</td> <td>/</td> <td>/</td> <td>/</td> </tr> <tr> <th>6</th> <td></td> <td></td> <td></td> <td>/</td> <td>/</td> <td>/</td> <td>/</td> </tr> <tr> <th>7</th> <td></td> <td></td> <td></td> <td></td> <td>/</td> <td>ns</td> <td>ns</td> </tr> <tr> <th>8</th> <td></td> <td></td> <td></td> <td></td> <td></td> <td>/</td> <td>/</td> </tr> <tr> <th>9</th> <td></td> <td></td> <td></td> <td></td> <td></td> <td></td> <td>ns</td> </tr> <tr> <th>10</th> <td></td> <td></td> <td></td> <td></td> <td></td> <td></td> <td></td> </tr> </tbody> </table>     | pH                 | 4    | 5    | 6    | 7    | 8    | 9    | 10 | 4 |  | / | / | **** | / | **** | **** | 5 |  |  | / | / | / | / | / | 6 |  |  |  | / | / | / | / | 7 |  |  |  |  | / | ns   | ns   | 8 |  |  |  |  |  | / | / | 9 |  |  |  |  |  |  | ns   | 10 |  |  |  |  |  |  |  | <table border="1"> <thead> <tr> <th>pH</th> <th>4</th> <th>5</th> <th>6</th> <th>7</th> <th>8</th> <th>9</th> <th>10</th> </tr> </thead> <tbody> <tr> <th>4</th> <td></td> <td>ns</td> <td>ns</td> <td>*</td> <td>*</td> <td>**</td> <td>ns</td> </tr> <tr> <th>5</th> <td></td> <td></td> <td>ns</td> <td>ns</td> <td>ns</td> <td>ns</td> <td>ns</td> </tr> <tr> <th>6</th> <td></td> <td></td> <td></td> <td>ns</td> <td>ns</td> <td>ns</td> <td>ns</td> </tr> <tr> <th>7</th> <td></td> <td></td> <td></td> <td></td> <td>ns</td> <td>ns</td> <td>ns</td> </tr> <tr> <th>8</th> <td></td> <td></td> <td></td> <td></td> <td></td> <td>ns</td> <td>ns</td> </tr> <tr> <th>9</th> <td></td> <td></td> <td></td> <td></td> <td></td> <td></td> <td>ns</td> </tr> <tr> <th>10</th> <td></td> <td></td> <td></td> <td></td> <td></td> <td></td> <td></td> </tr> </tbody> </table>                     | pH | 4 | 5 | 6 | 7 | 8 | 9 | 10 | 4 |  | ns   | ns   | *    | *    | **   | ns   | 5 |  |  | ns | ns  | ns   | ns   | ns   | 6 |  |  |  | ns | ns | ns | ns | 7 |  |  |  |  | ns | ns | ns | 8 |  |  |  |  |  | ns | ns | 9 |  |  |  |  |  |  | ns | 10 |  |  |  |  |  |  |  |
|                | pH                                                                                                                                                                                                                                                                                                                                                                                                                                                                                                                                                                                                                                                                                                                                                                                                                                                                           | 4                  | 5    | 6    | 7    | 8    | 9    | 10   |    |   |  |   |   |      |   |      |      |   |  |  |   |   |   |   |   |   |  |  |  |   |   |   |   |   |  |  |  |  |   |      |      |   |  |  |  |  |  |   |   |   |  |  |  |  |  |  |      |    |  |  |  |  |  |  |  |                                                                                                                                                                                                                                                                                                                                                                                                                                                                                                                                                                                                                                                                                                                                                                                                                                                                                                     |    |   |   |   |   |   |   |    |   |  |      |      |      |      |      |      |   |  |  |    |     |      |      |      |   |  |  |  |    |    |    |    |   |  |  |  |  |    |    |    |   |  |  |  |  |  |    |    |   |  |  |  |  |  |  |    |    |  |  |  |  |  |  |  |
|                | 4                                                                                                                                                                                                                                                                                                                                                                                                                                                                                                                                                                                                                                                                                                                                                                                                                                                                            |                    | /    | /    | **** | /    | **** | **** |    |   |  |   |   |      |   |      |      |   |  |  |   |   |   |   |   |   |  |  |  |   |   |   |   |   |  |  |  |  |   |      |      |   |  |  |  |  |  |   |   |   |  |  |  |  |  |  |      |    |  |  |  |  |  |  |  |                                                                                                                                                                                                                                                                                                                                                                                                                                                                                                                                                                                                                                                                                                                                                                                                                                                                                                     |    |   |   |   |   |   |   |    |   |  |      |      |      |      |      |      |   |  |  |    |     |      |      |      |   |  |  |  |    |    |    |    |   |  |  |  |  |    |    |    |   |  |  |  |  |  |    |    |   |  |  |  |  |  |  |    |    |  |  |  |  |  |  |  |
|                | 5                                                                                                                                                                                                                                                                                                                                                                                                                                                                                                                                                                                                                                                                                                                                                                                                                                                                            |                    |      | /    | /    | /    | /    | /    |    |   |  |   |   |      |   |      |      |   |  |  |   |   |   |   |   |   |  |  |  |   |   |   |   |   |  |  |  |  |   |      |      |   |  |  |  |  |  |   |   |   |  |  |  |  |  |  |      |    |  |  |  |  |  |  |  |                                                                                                                                                                                                                                                                                                                                                                                                                                                                                                                                                                                                                                                                                                                                                                                                                                                                                                     |    |   |   |   |   |   |   |    |   |  |      |      |      |      |      |      |   |  |  |    |     |      |      |      |   |  |  |  |    |    |    |    |   |  |  |  |  |    |    |    |   |  |  |  |  |  |    |    |   |  |  |  |  |  |  |    |    |  |  |  |  |  |  |  |
| 6              |                                                                                                                                                                                                                                                                                                                                                                                                                                                                                                                                                                                                                                                                                                                                                                                                                                                                              |                    |      | /    | /    | /    | /    |      |    |   |  |   |   |      |   |      |      |   |  |  |   |   |   |   |   |   |  |  |  |   |   |   |   |   |  |  |  |  |   |      |      |   |  |  |  |  |  |   |   |   |  |  |  |  |  |  |      |    |  |  |  |  |  |  |  |                                                                                                                                                                                                                                                                                                                                                                                                                                                                                                                                                                                                                                                                                                                                                                                                                                                                                                     |    |   |   |   |   |   |   |    |   |  |      |      |      |      |      |      |   |  |  |    |     |      |      |      |   |  |  |  |    |    |    |    |   |  |  |  |  |    |    |    |   |  |  |  |  |  |    |    |   |  |  |  |  |  |  |    |    |  |  |  |  |  |  |  |
| 7              |                                                                                                                                                                                                                                                                                                                                                                                                                                                                                                                                                                                                                                                                                                                                                                                                                                                                              |                    |      |      | /    | ns   | ns   |      |    |   |  |   |   |      |   |      |      |   |  |  |   |   |   |   |   |   |  |  |  |   |   |   |   |   |  |  |  |  |   |      |      |   |  |  |  |  |  |   |   |   |  |  |  |  |  |  |      |    |  |  |  |  |  |  |  |                                                                                                                                                                                                                                                                                                                                                                                                                                                                                                                                                                                                                                                                                                                                                                                                                                                                                                     |    |   |   |   |   |   |   |    |   |  |      |      |      |      |      |      |   |  |  |    |     |      |      |      |   |  |  |  |    |    |    |    |   |  |  |  |  |    |    |    |   |  |  |  |  |  |    |    |   |  |  |  |  |  |  |    |    |  |  |  |  |  |  |  |
| 8              |                                                                                                                                                                                                                                                                                                                                                                                                                                                                                                                                                                                                                                                                                                                                                                                                                                                                              |                    |      |      |      | /    | /    |      |    |   |  |   |   |      |   |      |      |   |  |  |   |   |   |   |   |   |  |  |  |   |   |   |   |   |  |  |  |  |   |      |      |   |  |  |  |  |  |   |   |   |  |  |  |  |  |  |      |    |  |  |  |  |  |  |  |                                                                                                                                                                                                                                                                                                                                                                                                                                                                                                                                                                                                                                                                                                                                                                                                                                                                                                     |    |   |   |   |   |   |   |    |   |  |      |      |      |      |      |      |   |  |  |    |     |      |      |      |   |  |  |  |    |    |    |    |   |  |  |  |  |    |    |    |   |  |  |  |  |  |    |    |   |  |  |  |  |  |  |    |    |  |  |  |  |  |  |  |
| 9              |                                                                                                                                                                                                                                                                                                                                                                                                                                                                                                                                                                                                                                                                                                                                                                                                                                                                              |                    |      |      |      |      | ns   |      |    |   |  |   |   |      |   |      |      |   |  |  |   |   |   |   |   |   |  |  |  |   |   |   |   |   |  |  |  |  |   |      |      |   |  |  |  |  |  |   |   |   |  |  |  |  |  |  |      |    |  |  |  |  |  |  |  |                                                                                                                                                                                                                                                                                                                                                                                                                                                                                                                                                                                                                                                                                                                                                                                                                                                                                                     |    |   |   |   |   |   |   |    |   |  |      |      |      |      |      |      |   |  |  |    |     |      |      |      |   |  |  |  |    |    |    |    |   |  |  |  |  |    |    |    |   |  |  |  |  |  |    |    |   |  |  |  |  |  |  |    |    |  |  |  |  |  |  |  |
| 10             |                                                                                                                                                                                                                                                                                                                                                                                                                                                                                                                                                                                                                                                                                                                                                                                                                                                                              |                    |      |      |      |      |      |      |    |   |  |   |   |      |   |      |      |   |  |  |   |   |   |   |   |   |  |  |  |   |   |   |   |   |  |  |  |  |   |      |      |   |  |  |  |  |  |   |   |   |  |  |  |  |  |  |      |    |  |  |  |  |  |  |  |                                                                                                                                                                                                                                                                                                                                                                                                                                                                                                                                                                                                                                                                                                                                                                                                                                                                                                     |    |   |   |   |   |   |   |    |   |  |      |      |      |      |      |      |   |  |  |    |     |      |      |      |   |  |  |  |    |    |    |    |   |  |  |  |  |    |    |    |   |  |  |  |  |  |    |    |   |  |  |  |  |  |  |    |    |  |  |  |  |  |  |  |
| pH             | 4                                                                                                                                                                                                                                                                                                                                                                                                                                                                                                                                                                                                                                                                                                                                                                                                                                                                            | 5                  | 6    | 7    | 8    | 9    | 10   |      |    |   |  |   |   |      |   |      |      |   |  |  |   |   |   |   |   |   |  |  |  |   |   |   |   |   |  |  |  |  |   |      |      |   |  |  |  |  |  |   |   |   |  |  |  |  |  |  |      |    |  |  |  |  |  |  |  |                                                                                                                                                                                                                                                                                                                                                                                                                                                                                                                                                                                                                                                                                                                                                                                                                                                                                                     |    |   |   |   |   |   |   |    |   |  |      |      |      |      |      |      |   |  |  |    |     |      |      |      |   |  |  |  |    |    |    |    |   |  |  |  |  |    |    |    |   |  |  |  |  |  |    |    |   |  |  |  |  |  |  |    |    |  |  |  |  |  |  |  |
| 4              |                                                                                                                                                                                                                                                                                                                                                                                                                                                                                                                                                                                                                                                                                                                                                                                                                                                                              | ns                 | ns   | *    | *    | **   | ns   |      |    |   |  |   |   |      |   |      |      |   |  |  |   |   |   |   |   |   |  |  |  |   |   |   |   |   |  |  |  |  |   |      |      |   |  |  |  |  |  |   |   |   |  |  |  |  |  |  |      |    |  |  |  |  |  |  |  |                                                                                                                                                                                                                                                                                                                                                                                                                                                                                                                                                                                                                                                                                                                                                                                                                                                                                                     |    |   |   |   |   |   |   |    |   |  |      |      |      |      |      |      |   |  |  |    |     |      |      |      |   |  |  |  |    |    |    |    |   |  |  |  |  |    |    |    |   |  |  |  |  |  |    |    |   |  |  |  |  |  |  |    |    |  |  |  |  |  |  |  |
| 5              |                                                                                                                                                                                                                                                                                                                                                                                                                                                                                                                                                                                                                                                                                                                                                                                                                                                                              |                    | ns   | ns   | ns   | ns   | ns   |      |    |   |  |   |   |      |   |      |      |   |  |  |   |   |   |   |   |   |  |  |  |   |   |   |   |   |  |  |  |  |   |      |      |   |  |  |  |  |  |   |   |   |  |  |  |  |  |  |      |    |  |  |  |  |  |  |  |                                                                                                                                                                                                                                                                                                                                                                                                                                                                                                                                                                                                                                                                                                                                                                                                                                                                                                     |    |   |   |   |   |   |   |    |   |  |      |      |      |      |      |      |   |  |  |    |     |      |      |      |   |  |  |  |    |    |    |    |   |  |  |  |  |    |    |    |   |  |  |  |  |  |    |    |   |  |  |  |  |  |  |    |    |  |  |  |  |  |  |  |
| 6              |                                                                                                                                                                                                                                                                                                                                                                                                                                                                                                                                                                                                                                                                                                                                                                                                                                                                              |                    |      | ns   | ns   | ns   | ns   |      |    |   |  |   |   |      |   |      |      |   |  |  |   |   |   |   |   |   |  |  |  |   |   |   |   |   |  |  |  |  |   |      |      |   |  |  |  |  |  |   |   |   |  |  |  |  |  |  |      |    |  |  |  |  |  |  |  |                                                                                                                                                                                                                                                                                                                                                                                                                                                                                                                                                                                                                                                                                                                                                                                                                                                                                                     |    |   |   |   |   |   |   |    |   |  |      |      |      |      |      |      |   |  |  |    |     |      |      |      |   |  |  |  |    |    |    |    |   |  |  |  |  |    |    |    |   |  |  |  |  |  |    |    |   |  |  |  |  |  |  |    |    |  |  |  |  |  |  |  |
| 7              |                                                                                                                                                                                                                                                                                                                                                                                                                                                                                                                                                                                                                                                                                                                                                                                                                                                                              |                    |      |      | ns   | ns   | ns   |      |    |   |  |   |   |      |   |      |      |   |  |  |   |   |   |   |   |   |  |  |  |   |   |   |   |   |  |  |  |  |   |      |      |   |  |  |  |  |  |   |   |   |  |  |  |  |  |  |      |    |  |  |  |  |  |  |  |                                                                                                                                                                                                                                                                                                                                                                                                                                                                                                                                                                                                                                                                                                                                                                                                                                                                                                     |    |   |   |   |   |   |   |    |   |  |      |      |      |      |      |      |   |  |  |    |     |      |      |      |   |  |  |  |    |    |    |    |   |  |  |  |  |    |    |    |   |  |  |  |  |  |    |    |   |  |  |  |  |  |  |    |    |  |  |  |  |  |  |  |
| 8              |                                                                                                                                                                                                                                                                                                                                                                                                                                                                                                                                                                                                                                                                                                                                                                                                                                                                              |                    |      |      |      | ns   | ns   |      |    |   |  |   |   |      |   |      |      |   |  |  |   |   |   |   |   |   |  |  |  |   |   |   |   |   |  |  |  |  |   |      |      |   |  |  |  |  |  |   |   |   |  |  |  |  |  |  |      |    |  |  |  |  |  |  |  |                                                                                                                                                                                                                                                                                                                                                                                                                                                                                                                                                                                                                                                                                                                                                                                                                                                                                                     |    |   |   |   |   |   |   |    |   |  |      |      |      |      |      |      |   |  |  |    |     |      |      |      |   |  |  |  |    |    |    |    |   |  |  |  |  |    |    |    |   |  |  |  |  |  |    |    |   |  |  |  |  |  |  |    |    |  |  |  |  |  |  |  |
| 9              |                                                                                                                                                                                                                                                                                                                                                                                                                                                                                                                                                                                                                                                                                                                                                                                                                                                                              |                    |      |      |      |      | ns   |      |    |   |  |   |   |      |   |      |      |   |  |  |   |   |   |   |   |   |  |  |  |   |   |   |   |   |  |  |  |  |   |      |      |   |  |  |  |  |  |   |   |   |  |  |  |  |  |  |      |    |  |  |  |  |  |  |  |                                                                                                                                                                                                                                                                                                                                                                                                                                                                                                                                                                                                                                                                                                                                                                                                                                                                                                     |    |   |   |   |   |   |   |    |   |  |      |      |      |      |      |      |   |  |  |    |     |      |      |      |   |  |  |  |    |    |    |    |   |  |  |  |  |    |    |    |   |  |  |  |  |  |    |    |   |  |  |  |  |  |  |    |    |  |  |  |  |  |  |  |
| 10             |                                                                                                                                                                                                                                                                                                                                                                                                                                                                                                                                                                                                                                                                                                                                                                                                                                                                              |                    |      |      |      |      |      |      |    |   |  |   |   |      |   |      |      |   |  |  |   |   |   |   |   |   |  |  |  |   |   |   |   |   |  |  |  |  |   |      |      |   |  |  |  |  |  |   |   |   |  |  |  |  |  |  |      |    |  |  |  |  |  |  |  |                                                                                                                                                                                                                                                                                                                                                                                                                                                                                                                                                                                                                                                                                                                                                                                                                                                                                                     |    |   |   |   |   |   |   |    |   |  |      |      |      |      |      |      |   |  |  |    |     |      |      |      |   |  |  |  |    |    |    |    |   |  |  |  |  |    |    |    |   |  |  |  |  |  |    |    |   |  |  |  |  |  |  |    |    |  |  |  |  |  |  |  |
| <i>E. coli</i> | <table border="1"> <thead> <tr> <th>pH</th> <th>4</th> <th>5</th> <th>6</th> <th>7</th> <th>8</th> <th>9</th> <th>10</th> </tr> </thead> <tbody> <tr> <th>4</th> <td></td> <td>/</td> <td>/</td> <td>***</td> <td>/</td> <td>****</td> <td>ns</td> </tr> <tr> <th>5</th> <td></td> <td></td> <td>/</td> <td>/</td> <td>/</td> <td>/</td> <td>/</td> </tr> <tr> <th>6</th> <td></td> <td></td> <td></td> <td>/</td> <td>/</td> <td>/</td> <td>/</td> </tr> <tr> <th>7</th> <td></td> <td></td> <td></td> <td></td> <td>/</td> <td>ns</td> <td>***</td> </tr> <tr> <th>8</th> <td></td> <td></td> <td></td> <td></td> <td></td> <td>/</td> <td>/</td> </tr> <tr> <th>9</th> <td></td> <td></td> <td></td> <td></td> <td></td> <td></td> <td>****</td> </tr> <tr> <th>10</th> <td></td> <td></td> <td></td> <td></td> <td></td> <td></td> <td></td> </tr> </tbody> </table>     | pH                 | 4    | 5    | 6    | 7    | 8    | 9    | 10 | 4 |  | / | / | ***  | / | **** | ns   | 5 |  |  | / | / | / | / | / | 6 |  |  |  | / | / | / | / | 7 |  |  |  |  | / | ns   | ***  | 8 |  |  |  |  |  | / | / | 9 |  |  |  |  |  |  | **** | 10 |  |  |  |  |  |  |  | <table border="1"> <thead> <tr> <th>pH</th> <th>4</th> <th>5</th> <th>6</th> <th>7</th> <th>8</th> <th>9</th> <th>10</th> </tr> </thead> <tbody> <tr> <th>4</th> <td></td> <td>***</td> <td>****</td> <td>****</td> <td>****</td> <td>****</td> <td>ns</td> </tr> <tr> <th>5</th> <td></td> <td></td> <td>ns</td> <td>ns</td> <td>ns</td> <td>ns</td> <td>ns</td> </tr> <tr> <th>6</th> <td></td> <td></td> <td></td> <td>ns</td> <td>ns</td> <td>ns</td> <td>ns</td> </tr> <tr> <th>7</th> <td></td> <td></td> <td></td> <td></td> <td>ns</td> <td>ns</td> <td>ns</td> </tr> <tr> <th>8</th> <td></td> <td></td> <td></td> <td></td> <td></td> <td>ns</td> <td>*</td> </tr> <tr> <th>9</th> <td></td> <td></td> <td></td> <td></td> <td></td> <td></td> <td>*</td> </tr> <tr> <th>10</th> <td></td> <td></td> <td></td> <td></td> <td></td> <td></td> <td></td> </tr> </tbody> </table>            | pH | 4 | 5 | 6 | 7 | 8 | 9 | 10 | 4 |  | ***  | **** | **** | **** | **** | ns   | 5 |  |  | ns | ns  | ns   | ns   | ns   | 6 |  |  |  | ns | ns | ns | ns | 7 |  |  |  |  | ns | ns | ns | 8 |  |  |  |  |  | ns | *  | 9 |  |  |  |  |  |  | *  | 10 |  |  |  |  |  |  |  |
|                | pH                                                                                                                                                                                                                                                                                                                                                                                                                                                                                                                                                                                                                                                                                                                                                                                                                                                                           | 4                  | 5    | 6    | 7    | 8    | 9    | 10   |    |   |  |   |   |      |   |      |      |   |  |  |   |   |   |   |   |   |  |  |  |   |   |   |   |   |  |  |  |  |   |      |      |   |  |  |  |  |  |   |   |   |  |  |  |  |  |  |      |    |  |  |  |  |  |  |  |                                                                                                                                                                                                                                                                                                                                                                                                                                                                                                                                                                                                                                                                                                                                                                                                                                                                                                     |    |   |   |   |   |   |   |    |   |  |      |      |      |      |      |      |   |  |  |    |     |      |      |      |   |  |  |  |    |    |    |    |   |  |  |  |  |    |    |    |   |  |  |  |  |  |    |    |   |  |  |  |  |  |  |    |    |  |  |  |  |  |  |  |
|                | 4                                                                                                                                                                                                                                                                                                                                                                                                                                                                                                                                                                                                                                                                                                                                                                                                                                                                            |                    | /    | /    | ***  | /    | **** | ns   |    |   |  |   |   |      |   |      |      |   |  |  |   |   |   |   |   |   |  |  |  |   |   |   |   |   |  |  |  |  |   |      |      |   |  |  |  |  |  |   |   |   |  |  |  |  |  |  |      |    |  |  |  |  |  |  |  |                                                                                                                                                                                                                                                                                                                                                                                                                                                                                                                                                                                                                                                                                                                                                                                                                                                                                                     |    |   |   |   |   |   |   |    |   |  |      |      |      |      |      |      |   |  |  |    |     |      |      |      |   |  |  |  |    |    |    |    |   |  |  |  |  |    |    |    |   |  |  |  |  |  |    |    |   |  |  |  |  |  |  |    |    |  |  |  |  |  |  |  |
|                | 5                                                                                                                                                                                                                                                                                                                                                                                                                                                                                                                                                                                                                                                                                                                                                                                                                                                                            |                    |      | /    | /    | /    | /    | /    |    |   |  |   |   |      |   |      |      |   |  |  |   |   |   |   |   |   |  |  |  |   |   |   |   |   |  |  |  |  |   |      |      |   |  |  |  |  |  |   |   |   |  |  |  |  |  |  |      |    |  |  |  |  |  |  |  |                                                                                                                                                                                                                                                                                                                                                                                                                                                                                                                                                                                                                                                                                                                                                                                                                                                                                                     |    |   |   |   |   |   |   |    |   |  |      |      |      |      |      |      |   |  |  |    |     |      |      |      |   |  |  |  |    |    |    |    |   |  |  |  |  |    |    |    |   |  |  |  |  |  |    |    |   |  |  |  |  |  |  |    |    |  |  |  |  |  |  |  |
| 6              |                                                                                                                                                                                                                                                                                                                                                                                                                                                                                                                                                                                                                                                                                                                                                                                                                                                                              |                    |      | /    | /    | /    | /    |      |    |   |  |   |   |      |   |      |      |   |  |  |   |   |   |   |   |   |  |  |  |   |   |   |   |   |  |  |  |  |   |      |      |   |  |  |  |  |  |   |   |   |  |  |  |  |  |  |      |    |  |  |  |  |  |  |  |                                                                                                                                                                                                                                                                                                                                                                                                                                                                                                                                                                                                                                                                                                                                                                                                                                                                                                     |    |   |   |   |   |   |   |    |   |  |      |      |      |      |      |      |   |  |  |    |     |      |      |      |   |  |  |  |    |    |    |    |   |  |  |  |  |    |    |    |   |  |  |  |  |  |    |    |   |  |  |  |  |  |  |    |    |  |  |  |  |  |  |  |
| 7              |                                                                                                                                                                                                                                                                                                                                                                                                                                                                                                                                                                                                                                                                                                                                                                                                                                                                              |                    |      |      | /    | ns   | ***  |      |    |   |  |   |   |      |   |      |      |   |  |  |   |   |   |   |   |   |  |  |  |   |   |   |   |   |  |  |  |  |   |      |      |   |  |  |  |  |  |   |   |   |  |  |  |  |  |  |      |    |  |  |  |  |  |  |  |                                                                                                                                                                                                                                                                                                                                                                                                                                                                                                                                                                                                                                                                                                                                                                                                                                                                                                     |    |   |   |   |   |   |   |    |   |  |      |      |      |      |      |      |   |  |  |    |     |      |      |      |   |  |  |  |    |    |    |    |   |  |  |  |  |    |    |    |   |  |  |  |  |  |    |    |   |  |  |  |  |  |  |    |    |  |  |  |  |  |  |  |
| 8              |                                                                                                                                                                                                                                                                                                                                                                                                                                                                                                                                                                                                                                                                                                                                                                                                                                                                              |                    |      |      |      | /    | /    |      |    |   |  |   |   |      |   |      |      |   |  |  |   |   |   |   |   |   |  |  |  |   |   |   |   |   |  |  |  |  |   |      |      |   |  |  |  |  |  |   |   |   |  |  |  |  |  |  |      |    |  |  |  |  |  |  |  |                                                                                                                                                                                                                                                                                                                                                                                                                                                                                                                                                                                                                                                                                                                                                                                                                                                                                                     |    |   |   |   |   |   |   |    |   |  |      |      |      |      |      |      |   |  |  |    |     |      |      |      |   |  |  |  |    |    |    |    |   |  |  |  |  |    |    |    |   |  |  |  |  |  |    |    |   |  |  |  |  |  |  |    |    |  |  |  |  |  |  |  |
| 9              |                                                                                                                                                                                                                                                                                                                                                                                                                                                                                                                                                                                                                                                                                                                                                                                                                                                                              |                    |      |      |      |      | **** |      |    |   |  |   |   |      |   |      |      |   |  |  |   |   |   |   |   |   |  |  |  |   |   |   |   |   |  |  |  |  |   |      |      |   |  |  |  |  |  |   |   |   |  |  |  |  |  |  |      |    |  |  |  |  |  |  |  |                                                                                                                                                                                                                                                                                                                                                                                                                                                                                                                                                                                                                                                                                                                                                                                                                                                                                                     |    |   |   |   |   |   |   |    |   |  |      |      |      |      |      |      |   |  |  |    |     |      |      |      |   |  |  |  |    |    |    |    |   |  |  |  |  |    |    |    |   |  |  |  |  |  |    |    |   |  |  |  |  |  |  |    |    |  |  |  |  |  |  |  |
| 10             |                                                                                                                                                                                                                                                                                                                                                                                                                                                                                                                                                                                                                                                                                                                                                                                                                                                                              |                    |      |      |      |      |      |      |    |   |  |   |   |      |   |      |      |   |  |  |   |   |   |   |   |   |  |  |  |   |   |   |   |   |  |  |  |  |   |      |      |   |  |  |  |  |  |   |   |   |  |  |  |  |  |  |      |    |  |  |  |  |  |  |  |                                                                                                                                                                                                                                                                                                                                                                                                                                                                                                                                                                                                                                                                                                                                                                                                                                                                                                     |    |   |   |   |   |   |   |    |   |  |      |      |      |      |      |      |   |  |  |    |     |      |      |      |   |  |  |  |    |    |    |    |   |  |  |  |  |    |    |    |   |  |  |  |  |  |    |    |   |  |  |  |  |  |  |    |    |  |  |  |  |  |  |  |
| pH             | 4                                                                                                                                                                                                                                                                                                                                                                                                                                                                                                                                                                                                                                                                                                                                                                                                                                                                            | 5                  | 6    | 7    | 8    | 9    | 10   |      |    |   |  |   |   |      |   |      |      |   |  |  |   |   |   |   |   |   |  |  |  |   |   |   |   |   |  |  |  |  |   |      |      |   |  |  |  |  |  |   |   |   |  |  |  |  |  |  |      |    |  |  |  |  |  |  |  |                                                                                                                                                                                                                                                                                                                                                                                                                                                                                                                                                                                                                                                                                                                                                                                                                                                                                                     |    |   |   |   |   |   |   |    |   |  |      |      |      |      |      |      |   |  |  |    |     |      |      |      |   |  |  |  |    |    |    |    |   |  |  |  |  |    |    |    |   |  |  |  |  |  |    |    |   |  |  |  |  |  |  |    |    |  |  |  |  |  |  |  |
| 4              |                                                                                                                                                                                                                                                                                                                                                                                                                                                                                                                                                                                                                                                                                                                                                                                                                                                                              | ***                | **** | **** | **** | **** | ns   |      |    |   |  |   |   |      |   |      |      |   |  |  |   |   |   |   |   |   |  |  |  |   |   |   |   |   |  |  |  |  |   |      |      |   |  |  |  |  |  |   |   |   |  |  |  |  |  |  |      |    |  |  |  |  |  |  |  |                                                                                                                                                                                                                                                                                                                                                                                                                                                                                                                                                                                                                                                                                                                                                                                                                                                                                                     |    |   |   |   |   |   |   |    |   |  |      |      |      |      |      |      |   |  |  |    |     |      |      |      |   |  |  |  |    |    |    |    |   |  |  |  |  |    |    |    |   |  |  |  |  |  |    |    |   |  |  |  |  |  |  |    |    |  |  |  |  |  |  |  |
| 5              |                                                                                                                                                                                                                                                                                                                                                                                                                                                                                                                                                                                                                                                                                                                                                                                                                                                                              |                    | ns   | ns   | ns   | ns   | ns   |      |    |   |  |   |   |      |   |      |      |   |  |  |   |   |   |   |   |   |  |  |  |   |   |   |   |   |  |  |  |  |   |      |      |   |  |  |  |  |  |   |   |   |  |  |  |  |  |  |      |    |  |  |  |  |  |  |  |                                                                                                                                                                                                                                                                                                                                                                                                                                                                                                                                                                                                                                                                                                                                                                                                                                                                                                     |    |   |   |   |   |   |   |    |   |  |      |      |      |      |      |      |   |  |  |    |     |      |      |      |   |  |  |  |    |    |    |    |   |  |  |  |  |    |    |    |   |  |  |  |  |  |    |    |   |  |  |  |  |  |  |    |    |  |  |  |  |  |  |  |
| 6              |                                                                                                                                                                                                                                                                                                                                                                                                                                                                                                                                                                                                                                                                                                                                                                                                                                                                              |                    |      | ns   | ns   | ns   | ns   |      |    |   |  |   |   |      |   |      |      |   |  |  |   |   |   |   |   |   |  |  |  |   |   |   |   |   |  |  |  |  |   |      |      |   |  |  |  |  |  |   |   |   |  |  |  |  |  |  |      |    |  |  |  |  |  |  |  |                                                                                                                                                                                                                                                                                                                                                                                                                                                                                                                                                                                                                                                                                                                                                                                                                                                                                                     |    |   |   |   |   |   |   |    |   |  |      |      |      |      |      |      |   |  |  |    |     |      |      |      |   |  |  |  |    |    |    |    |   |  |  |  |  |    |    |    |   |  |  |  |  |  |    |    |   |  |  |  |  |  |  |    |    |  |  |  |  |  |  |  |
| 7              |                                                                                                                                                                                                                                                                                                                                                                                                                                                                                                                                                                                                                                                                                                                                                                                                                                                                              |                    |      |      | ns   | ns   | ns   |      |    |   |  |   |   |      |   |      |      |   |  |  |   |   |   |   |   |   |  |  |  |   |   |   |   |   |  |  |  |  |   |      |      |   |  |  |  |  |  |   |   |   |  |  |  |  |  |  |      |    |  |  |  |  |  |  |  |                                                                                                                                                                                                                                                                                                                                                                                                                                                                                                                                                                                                                                                                                                                                                                                                                                                                                                     |    |   |   |   |   |   |   |    |   |  |      |      |      |      |      |      |   |  |  |    |     |      |      |      |   |  |  |  |    |    |    |    |   |  |  |  |  |    |    |    |   |  |  |  |  |  |    |    |   |  |  |  |  |  |  |    |    |  |  |  |  |  |  |  |
| 8              |                                                                                                                                                                                                                                                                                                                                                                                                                                                                                                                                                                                                                                                                                                                                                                                                                                                                              |                    |      |      |      | ns   | *    |      |    |   |  |   |   |      |   |      |      |   |  |  |   |   |   |   |   |   |  |  |  |   |   |   |   |   |  |  |  |  |   |      |      |   |  |  |  |  |  |   |   |   |  |  |  |  |  |  |      |    |  |  |  |  |  |  |  |                                                                                                                                                                                                                                                                                                                                                                                                                                                                                                                                                                                                                                                                                                                                                                                                                                                                                                     |    |   |   |   |   |   |   |    |   |  |      |      |      |      |      |      |   |  |  |    |     |      |      |      |   |  |  |  |    |    |    |    |   |  |  |  |  |    |    |    |   |  |  |  |  |  |    |    |   |  |  |  |  |  |  |    |    |  |  |  |  |  |  |  |
| 9              |                                                                                                                                                                                                                                                                                                                                                                                                                                                                                                                                                                                                                                                                                                                                                                                                                                                                              |                    |      |      |      |      | *    |      |    |   |  |   |   |      |   |      |      |   |  |  |   |   |   |   |   |   |  |  |  |   |   |   |   |   |  |  |  |  |   |      |      |   |  |  |  |  |  |   |   |   |  |  |  |  |  |  |      |    |  |  |  |  |  |  |  |                                                                                                                                                                                                                                                                                                                                                                                                                                                                                                                                                                                                                                                                                                                                                                                                                                                                                                     |    |   |   |   |   |   |   |    |   |  |      |      |      |      |      |      |   |  |  |    |     |      |      |      |   |  |  |  |    |    |    |    |   |  |  |  |  |    |    |    |   |  |  |  |  |  |    |    |   |  |  |  |  |  |  |    |    |  |  |  |  |  |  |  |
| 10             |                                                                                                                                                                                                                                                                                                                                                                                                                                                                                                                                                                                                                                                                                                                                                                                                                                                                              |                    |      |      |      |      |      |      |    |   |  |   |   |      |   |      |      |   |  |  |   |   |   |   |   |   |  |  |  |   |   |   |   |   |  |  |  |  |   |      |      |   |  |  |  |  |  |   |   |   |  |  |  |  |  |  |      |    |  |  |  |  |  |  |  |                                                                                                                                                                                                                                                                                                                                                                                                                                                                                                                                                                                                                                                                                                                                                                                                                                                                                                     |    |   |   |   |   |   |   |    |   |  |      |      |      |      |      |      |   |  |  |    |     |      |      |      |   |  |  |  |    |    |    |    |   |  |  |  |  |    |    |    |   |  |  |  |  |  |    |    |   |  |  |  |  |  |  |    |    |  |  |  |  |  |  |  |

## References

- (1) E. Appiani, R. Ossola, D. E. Latch, P. R. Erickson and K. McNeill, Aqueous singlet oxygen reaction kinetics of furfuryl alcohol: effect of temperature, pH, and salt content, *Environ. Sci.: Processes Impacts*, 2017, **19**, 507–516.
